# Supplementary material for: Synthesis of 1-hydroperoxy-1′-alkoxyperoxides by the iodine-catalyzed reactions of geminal bishydroperoxides with acetals or enol ethers
Source: Royal Society of Chemistry journal article supplement (doi:10.1039/b809661a), 2008-01-01
Supplement: b809661a.pdf [file b809661a.pdf]

**Supplementary Material (ESI) for  
Organic and Biomolecular Chemistry**

**This journal is © The Royal Society of Chemistry 2008**

**Synthesis of 1-Hydroperoxy-1'-Alkoxyperoxides by the Iodine-Catalyzed Reactions of Geminal  
Bishydroperoxides with Acetals or Enol Ethers**

**Alexander O. Terent'ev,<sup>\*a</sup> Maxim M. Platonov,<sup>a</sup> Igor B. Krylov,<sup>a</sup> Vladimir V. Chernyshev<sup>b,c</sup> and Gennady I. Nikishin <sup>a</sup>**

<sup>a</sup> *N. D. Zelinsky Institute of Organic Chemistry, Russian Academy of Sciences, 47 Leninsky prosp., 119991 Moscow, Russian Federation. Fax +7 (499) 1355328; E-mail: terentev@ioc.ac.ru*

<sup>b</sup> *Department of Chemistry, Moscow State University, 119992 Moscow, Russian Federation.*

<sup>c</sup> *A.N. Frumkin Institute of Physical Chemistry and Electrochemistry, Leninsky prospect 31, 119991 Moscow, Russian Federation.*

The molecular structure of **6d** has been confirmed by X-ray structure determination. Intensity data set was collected at room temperature using an Enraf-Nonius CAD4 diffractometer (Cu K $\alpha$  radiation,  $\lambda = 1.54184 \text{ \AA}$ ) equipped with a graphite monochromator. The crystal structure was solved by direct methods. Crystallographic programs used for structure solution and refinement, respectively, were *SHELXS97* and *SHELXL97* [1]. The structure was refined by full-matrix least-squares refinement on  $F^2$ . Hydrogen atoms were placed geometrically and refined using a riding model with  $U_{iso}$  constrained at 1.2 times  $U_{eq}$  of the carrier C or O atom. The crystal data, data collection and refinement parameters are given in Table.

Crystallographic data (excluding structure factors) for **6d** have been deposited with the Cambridge Crystallographic Data Centre as supplementary publication no. CCDC 689447. Copies of data can be obtained free of charge on application to CCDC, 12 Union Road, Cambridge CB21EZ, UK (fax: (44)1223-336-033; e-mail: deposit@ccdc.cam.ac.uk).

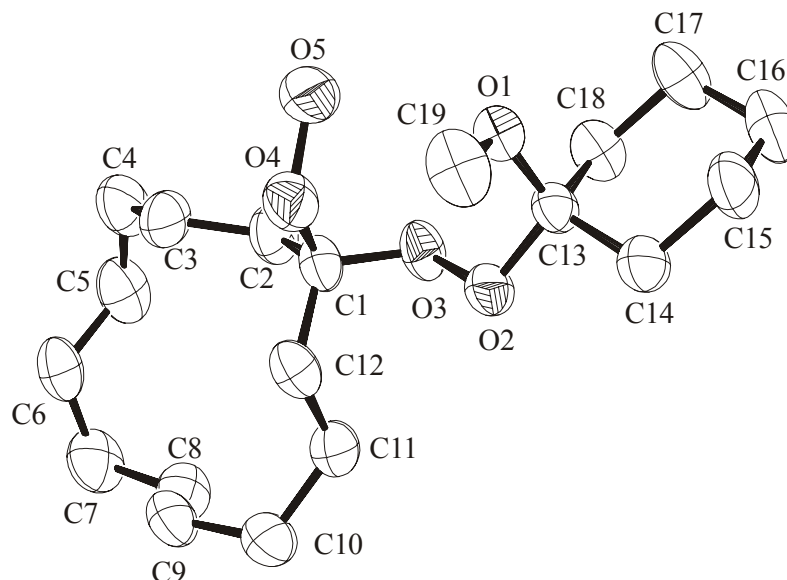

Fig. 1 The molecular structure of **6d**, showing the atomic numbering and 50% probability displacement ellipsoids. H atoms omitted for clarity.

The molecular structure of **6d** drawn with ORTEP-III [2] is presented on Fig. 1. All bond lengths and angles are normal and comparable with those observed in two close compounds – 1,1-bis(hydroperoxy)cyclododecane [3, 4] and 1,1'-dihydroperoxy-1,1'-bis(cyclododecyl)peroxide [5, 6], respectively – found in the Cambridge Structural Database (CSD, Version 5.29 [7]). The hydroxy group in **6d** is involved in intramolecular O5-H5...O1 hydrogen bonding (D...A, H...A and D-H...A are 2.763(4) Å, 2.08 Å and 141°, respectively). In the crystal, there are no intermolecular H...O contacts shorter than 2.75 Å, so crystal packing is typical of branched hydrocarbons, with hydrophobic space-filling contacts reflecting the simple close-packing of hydrophobic molecules [8, 9].

#### References.

- [1]. Sheldrick, G.M. *SHELXS97* and *SHELXL97. Programs for Crystal Structure Solution and Refinement*. University of Göttingen, Göttingen, Germany, **1997**.
- [2] L.J. Farrugia, *J. Appl. Cryst.*, 1999, **32**, 837-838.
- [3] P. Groth, *Acta Chem. Scand. A*, 1975, **29**, 840-842
- [4] A.O. Terent'ev, A.V. Kutkin, M.M. Platonov, I.I. Vorontsov, M.Yu. Antipin, Yu.N. Ogibin, G.I. Nikishin, *Izv. Akad. Nauk SSSR, Ser. Khim.*, 2004, 650-656 (In Russian) [*Russ. Chem. Bull.* 2004, **53**, 681-687].
- [5] P. Groth, *Acta Chem. Scand. A*, 1975, **29**, 783-786.
- [6] A.O. Terent'ev, A.V. Kutkin, M.M. Platonov, Z.A. Starikova, Yu.N. Ogibin, G.I. Nikishin, *Izv. Akad. Nauk SSSR, Ser. Khim.*, 2005, 1182-1185 (In Russian) [*Russ. Chem. Bull.* 2005, **54**, 1214-1218].
- [7] F.H. Allen, *Acta Cryst. B*, 2002, **B58**, 380-388.
- [8] F. Dubnikova, R. Kosloff, J. Almog, Y. Zeiri, R. Boese, H. Itzhaky, A. Alt, E. Keinan, *J. Am. Chem. Soc.*, 2005, **127**, 1146 -1159.
- [9] A.O. Terent'ev, M.M. Platonov, A.I. Tursina, V.V. Chernyshev, G.I. Nikishin, *J. Org. Chem.*, 2008, **73**, 3169-3174.

Table. Crystal data for **6d**.

| <b>1-Hydroperoxy-1-(1-methoxycyclohexylperoxy)cyclododecane, 6d</b> |                                                |
|---------------------------------------------------------------------|------------------------------------------------|
| empirical formula                                                   | C <sub>19</sub> H <sub>36</sub> O <sub>5</sub> |
| M <sub>r</sub>                                                      | 344.48                                         |
| crystal size, mm <sup>3</sup>                                       | 0.22 x 0.21 x 0.07                             |
| crystal form, colour                                                | plate, colourless                              |
| crystal system                                                      | triclinic                                      |
| space group                                                         | P-1                                            |
| unit cell dimensions                                                |                                                |
| a, Å                                                                | 8.3859(13)                                     |
| b, Å                                                                | 10.9820(14)                                    |
| c, Å                                                                | 11.3351(16)                                    |
| α, °                                                                | 109.105(11)                                    |
| β, °                                                                | 95.714(12)                                     |
| γ, °                                                                | 93.578(12)                                     |
| volume, Å <sup>3</sup>                                              | 976.5(3)                                       |
| Z                                                                   | 2                                              |
| μ, mm <sup>-1</sup>                                                 | 0.666                                          |
| no. reflns collected/independent                                    | 3904/3703 [ <i>R</i> (int) = 0.0372]           |
| no. params                                                          | 218                                            |
| GOF                                                                 | 0.936                                          |
| final <i>R</i> indices [ <i>I</i> > 2σ( <i>I</i> )]                 | <i>R</i> = 0.0518, <i>wR</i> = 0.1215          |

1-[(1-ethoxycyclopentyl)peroxy]cyclohexyl hydroperoxide (**3c**)

|                               |                                                                                                                                 |                       |                         |                             |                      |
|-------------------------------|---------------------------------------------------------------------------------------------------------------------------------|-----------------------|-------------------------|-----------------------------|----------------------|
| <b>Acquisition Time (sec)</b> | 0.6759                                                                                                                          | <b>Comment</b>        | Avance-300, cdcl3;tern; | <b>Date</b>                 | 16 Jan 2008 15:02:24 |
| <b>File Name</b>              | C:\Documents and Settings\Пользователь\Мои документы\Документы\Платонов\Спектры фиды\tern\iodid673.{1H}\iodid673.{1H}_001000fid |                       |                         |                             |                      |
| <b>Frequency (MHz)</b>        | 300.13                                                                                                                          | <b>Nucleus</b>        | <sup>1</sup> H          | <b>Number of Transients</b> | 1                    |
| <b>Points Count</b>           | 8192                                                                                                                            | <b>Pulse Sequence</b> | zg                      | <b>Solvent</b>              | CHLOROFORM-D         |
| <b>Temperature (degree C)</b> | 35.300                                                                                                                          |                       |                         | <b>Sweep Width (Hz)</b>     | 6009.62              |

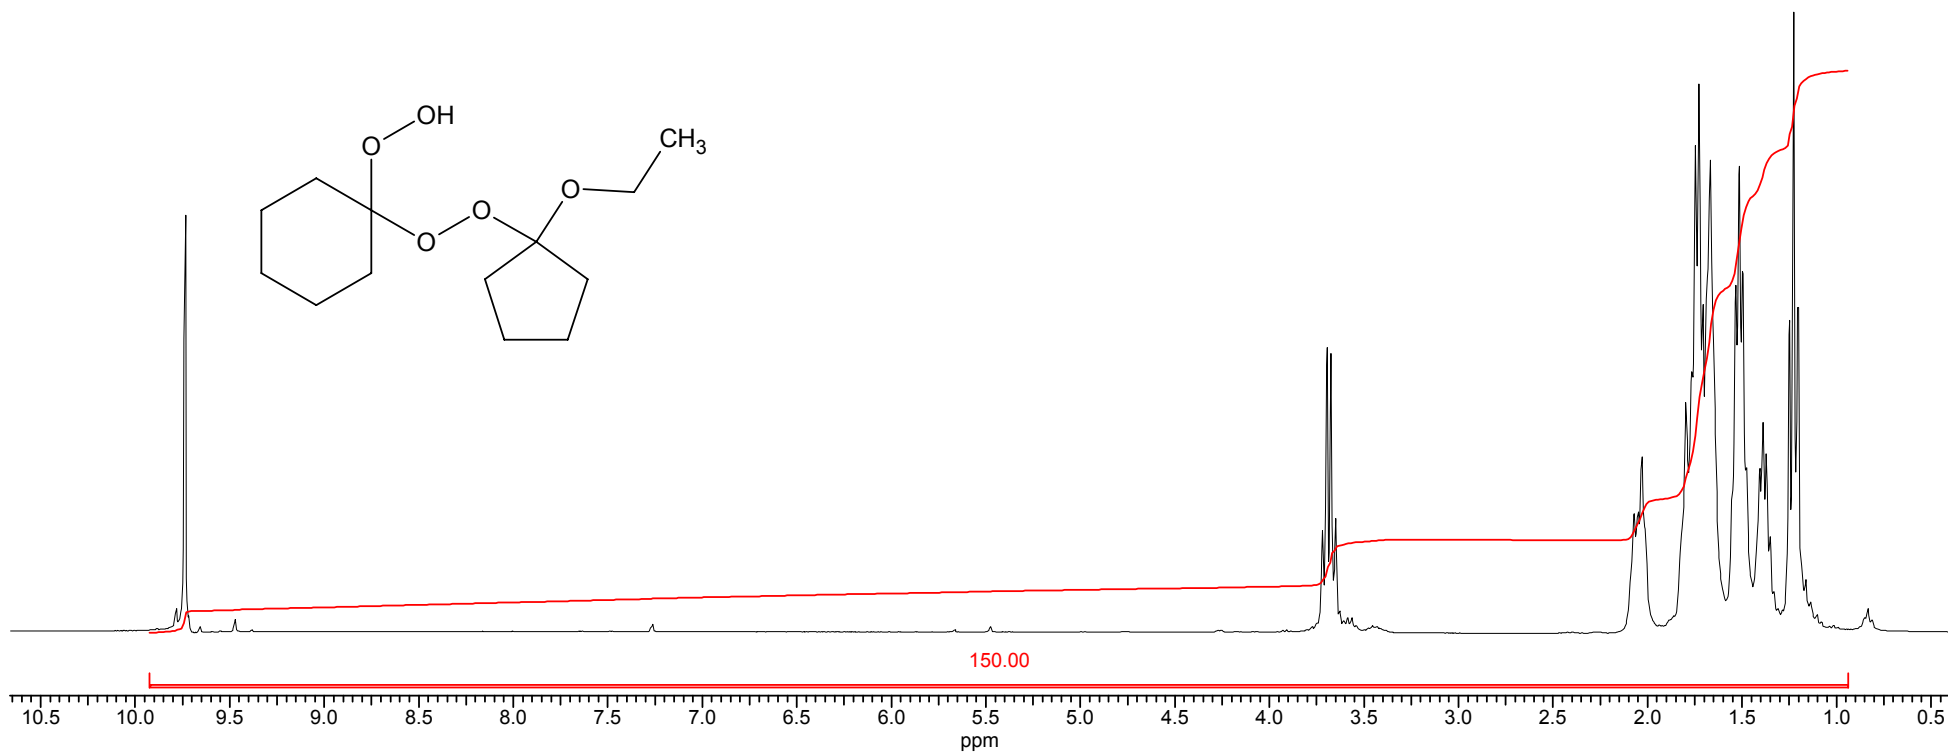

| No. | (ppm)       | Value   |
|-----|-------------|---------|
| 1   | 9.94 .. 9.9 | 150.000 |

1-[(1-ethoxycyclopentyl)peroxy]cyclohexyl hydroperoxide (**3c**)

|                        |                                                                                                        |                        |                                                    |                 |                     |
|------------------------|--------------------------------------------------------------------------------------------------------|------------------------|----------------------------------------------------|-----------------|---------------------|
| Acquisition Time (sec) | 0.3359                                                                                                 | Comment                | /TERN IODID673.C13 Opr:Struchkova M.I.;Solv:CDCl3; | Date            | 16/01/2008 19:21:34 |
| File Name              | C:\Documents and Settings\Пользователь\Мои документы\Документы\Платонов\Спектры фиды\tern\iodid673.c13 |                        |                                                    | Frequency (MHz) | 50.32               |
| Nucleus                | 13C                                                                                                    | Original Points Count  | 8192                                               | Points Count    | 8192                |
| Sweep Width (Hz)       | 12195.12                                                                                               | Temperature (degree C) | 24.000                                             | Solvent         |                     |

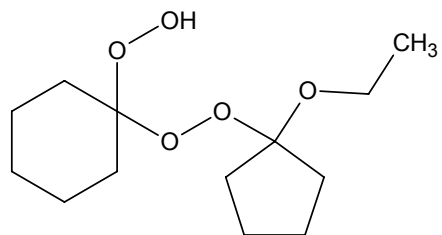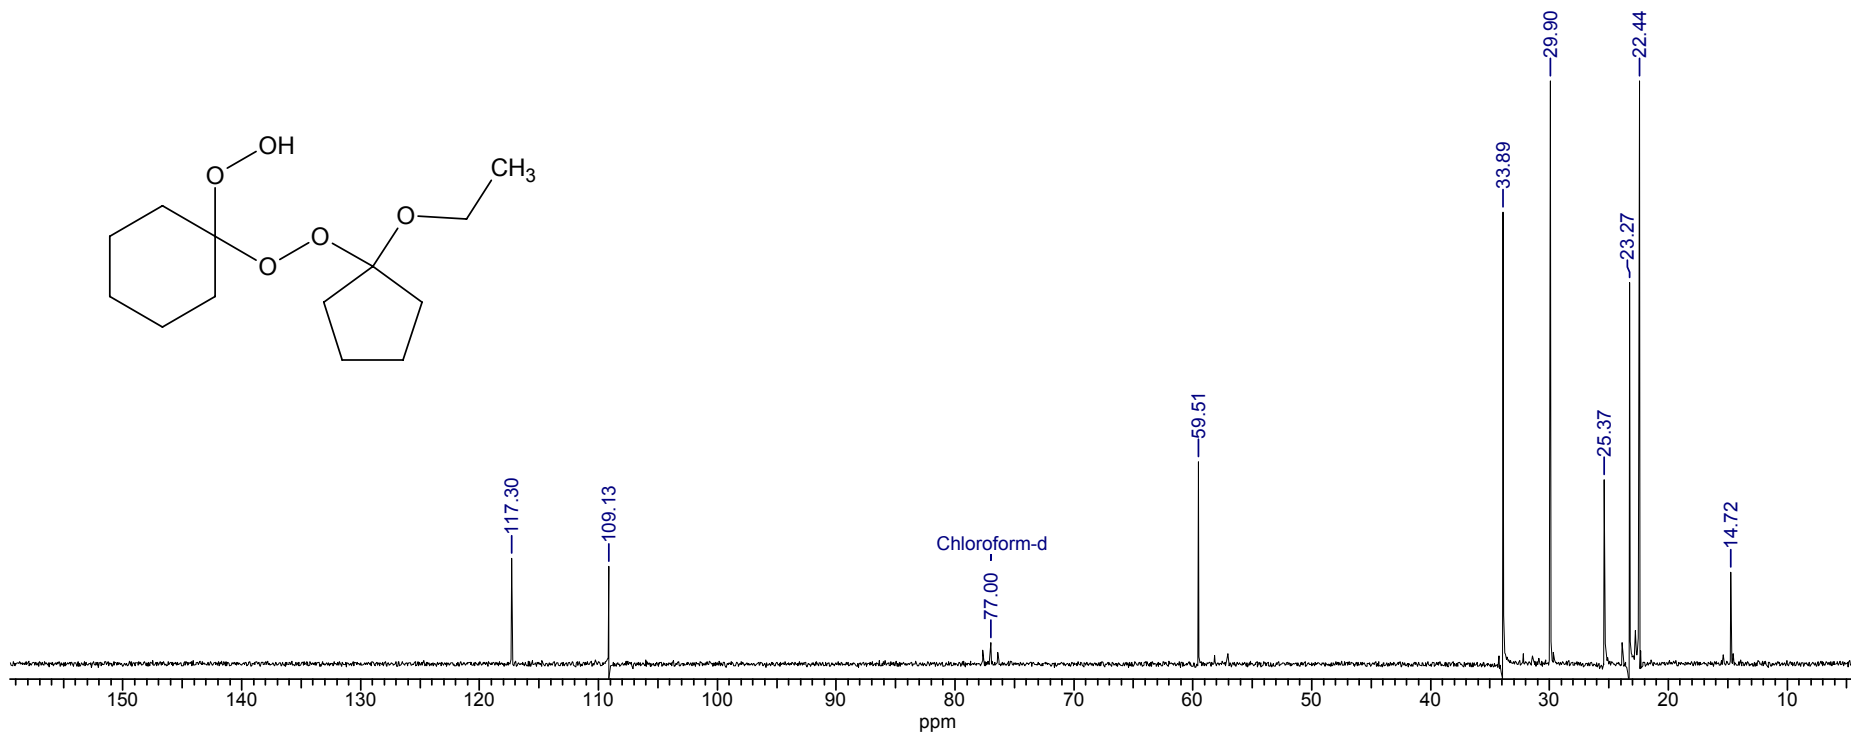

| No. | (ppm)  | (Hz)   | Height |
|-----|--------|--------|--------|
| 1   | 14.72  | 740.9  | 0.1575 |
| 2   | 22.44  | 1129.5 | 0.9998 |
| 3   | 23.27  | 1171.2 | 0.6538 |
| 4   | 25.37  | 1276.9 | 0.3160 |
| 5   | 29.90  | 1504.7 | 1.0000 |
| 6   | 33.89  | 1705.7 | 0.7752 |
| 7   | 59.51  | 2995.0 | 0.3468 |
| 8   | 77.00  | 3874.9 | 0.0363 |
| 9   | 109.13 | 5491.8 | 0.1667 |
| 10  | 117.30 | 5902.7 | 0.1813 |

| No. | Annotation   | (ppm) |
|-----|--------------|-------|
| 1   | Chloroform-d | 77.00 |

1-[(1-methoxycyclohexyl)peroxy]cyclohexyl hydroperoxide (**3d**)

|                               |                                                                                                    |                             |                                                |                               |                     |
|-------------------------------|----------------------------------------------------------------------------------------------------|-----------------------------|------------------------------------------------|-------------------------------|---------------------|
| <b>Acquisition Time (sec)</b> | 1.0240                                                                                             | <b>Comment</b>              | /TERN IODID675 Opr:Struchkova M.I.;Solv:CDCl3; | <b>Date</b>                   | 16/01/2008 19:47:36 |
| <b>File Name</b>              | C:\Documents and Settings\Пользователь\Мои документы\Документы\Платонов\Спектры фиды\tern\iodid675 |                             |                                                | <b>Frequency (MHz)</b>        | 200.13              |
| <b>Nucleus</b>                | 1H                                                                                                 | <b>Number of Transients</b> | 8                                              | <b>Original Points Count</b>  | 8192                |
| <b>Solvent</b>                | DMSO-D6                                                                                            | <b>Sweep Width (Hz)</b>     | 4000.00                                        | <b>Temperature (degree C)</b> | 24.000              |

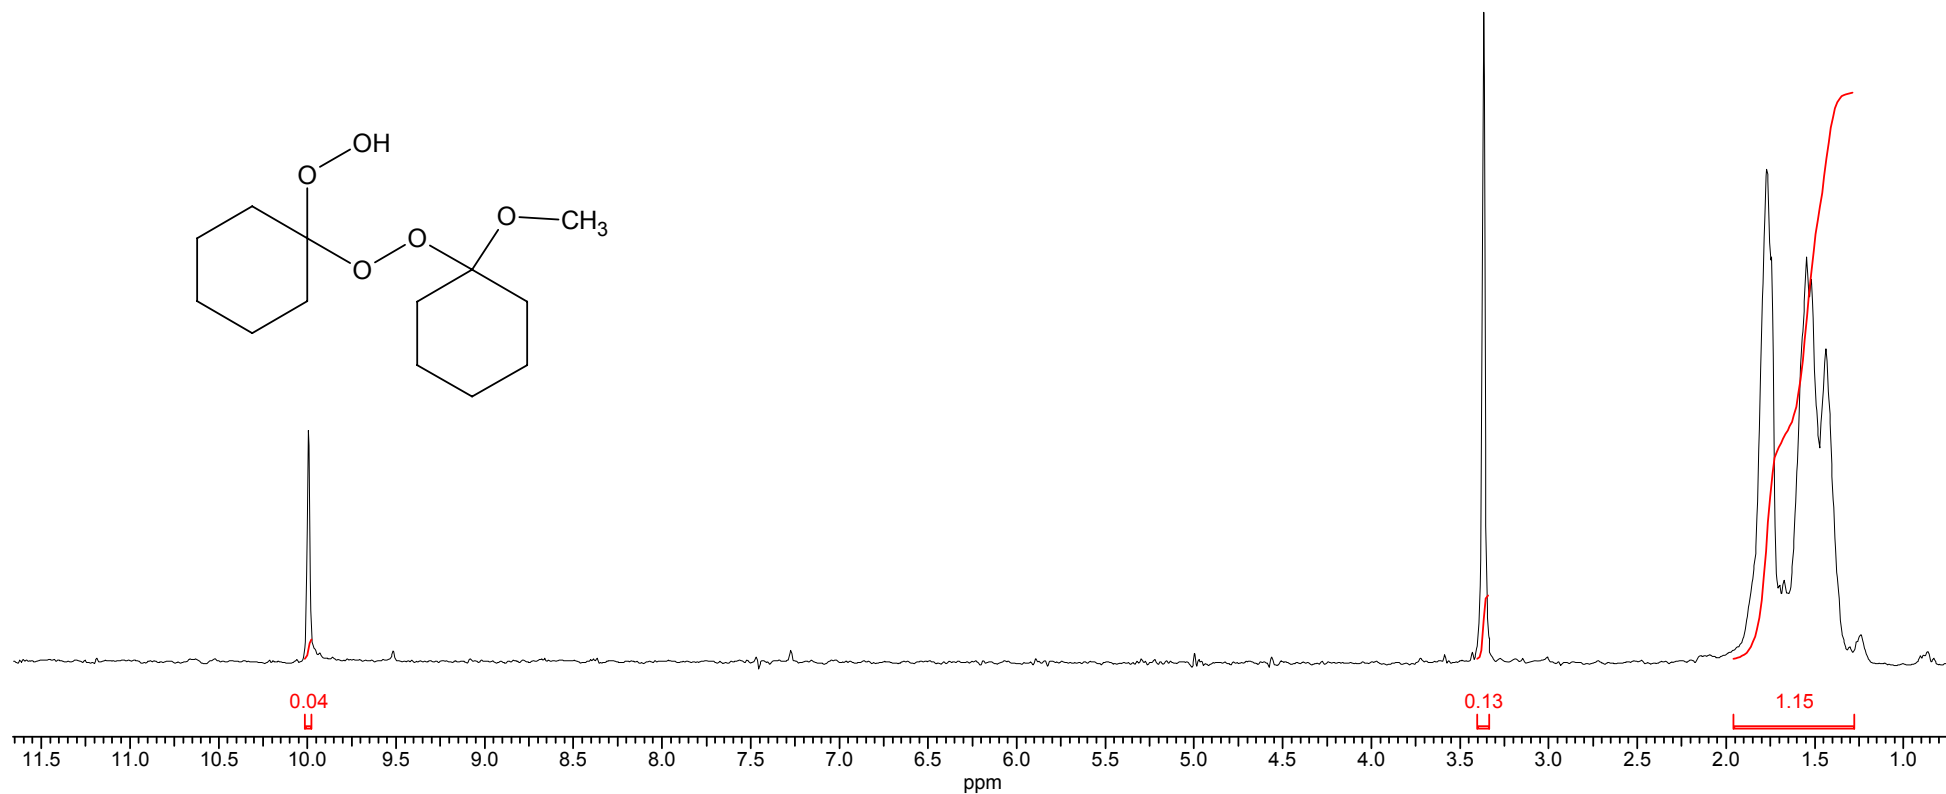

| No. | (ppm)       | Value |
|-----|-------------|-------|
| 1   | 1.28 .. 1.9 | 1.150 |
| 2   | 3.34 .. 3.4 | 0.131 |
| 3   | 9.8 .. 10.0 | 0.040 |

1-[(1-methoxycyclohexyl)peroxy]cyclohexyl hydroperoxide (**3d**)

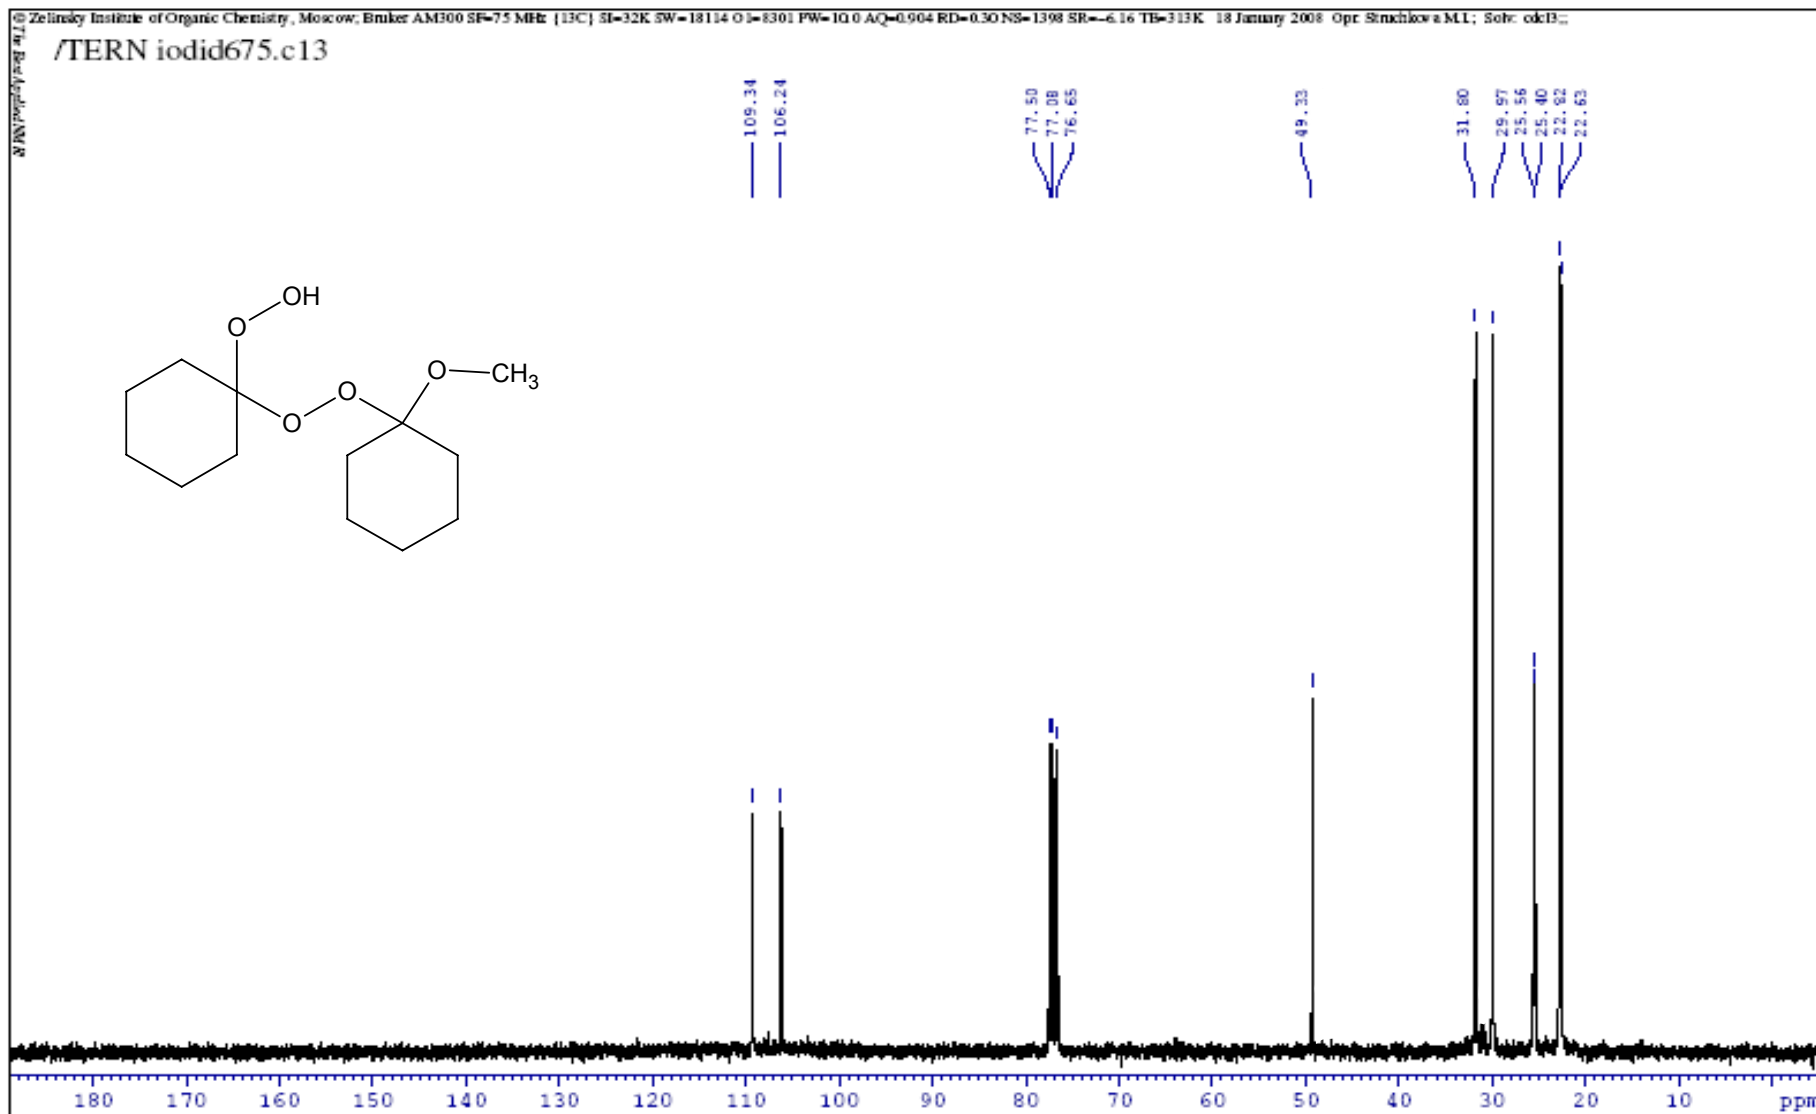



1-[(1-methoxycycloheptyl)peroxy]cyclohexyl hydroperoxide (**3e**)

|                               |                                                                                                                   |                       |                         |                              |                      |
|-------------------------------|-------------------------------------------------------------------------------------------------------------------|-----------------------|-------------------------|------------------------------|----------------------|
| <b>Acquisition Time (sec)</b> | 0.6759                                                                                                            | <b>Comment</b>        | Avance-300, cdcl3;tern; | <b>Date</b>                  | 16 Jan 2008 15:00:16 |
| <b>File Name</b>              | C:\Documents and Settings\user\My Documents\Платонов\Статья алкокси перокси\iodid674.{1H}\iodid674.{1H}_001000fid |                       |                         |                              |                      |
| <b>Frequency (MHz)</b>        | 300.13                                                                                                            | <b>Nucleus</b>        | 1H                      | <b>Number of Transients</b>  | 1                    |
| <b>Points Count</b>           | 8192                                                                                                              | <b>Pulse Sequence</b> | zg                      | <b>Solvent</b>               | CHLOROFORM-D         |
| <b>Temperature (degree C)</b> | 35.300                                                                                                            |                       |                         | <b>Original Points Count</b> | 8124                 |
|                               |                                                                                                                   |                       |                         | <b>Sweep Width (Hz)</b>      | 6009.62              |

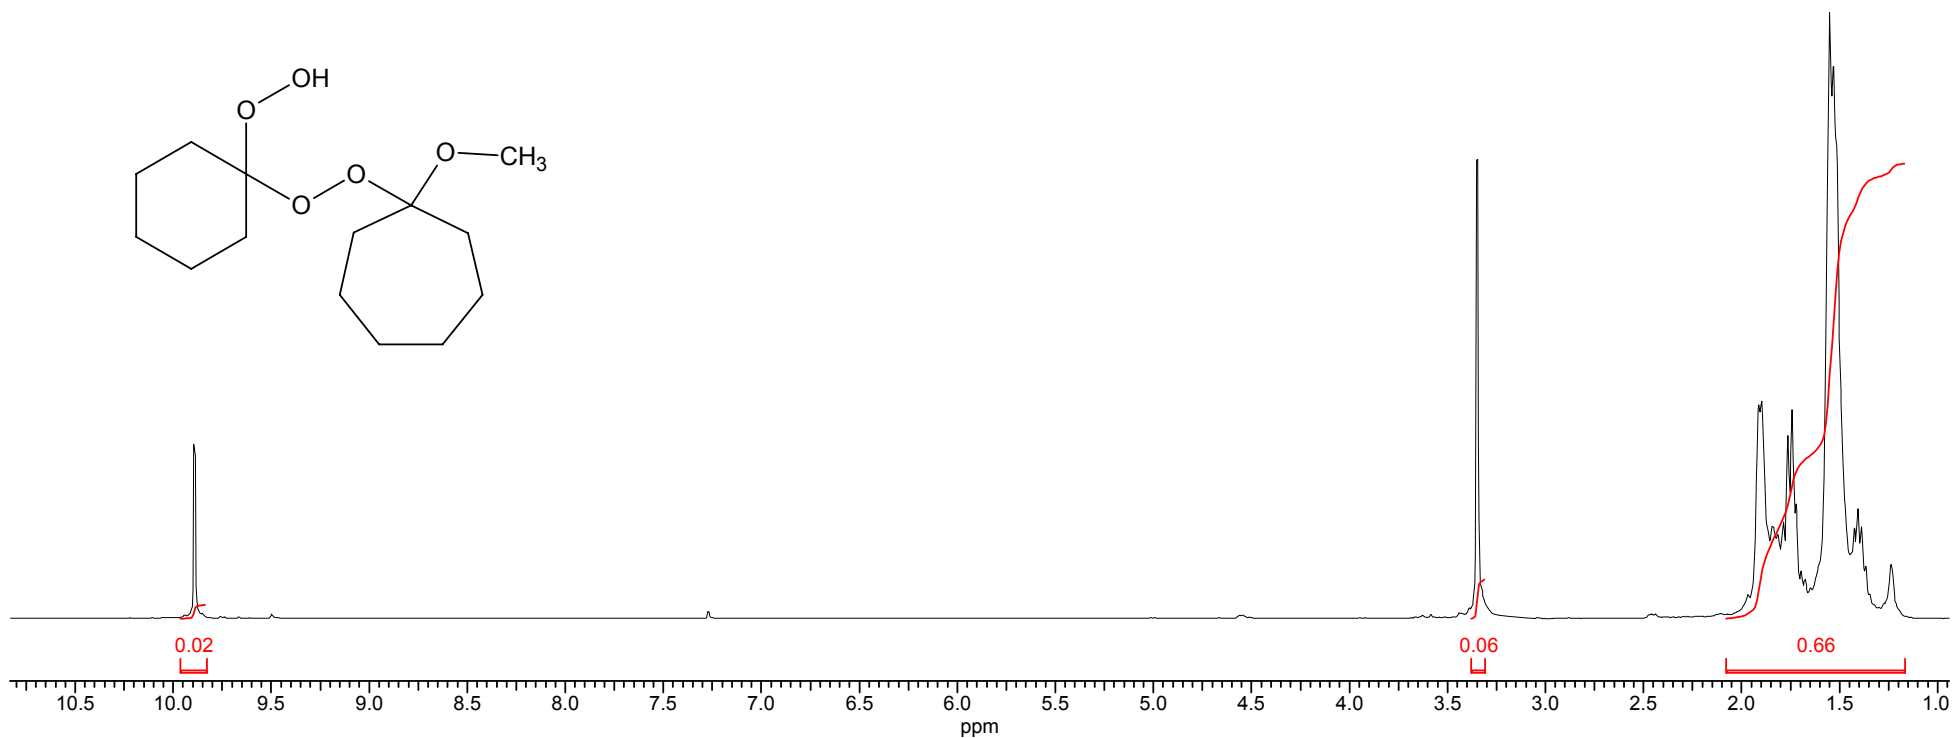

| No. | (ppm)          | Value |
|-----|----------------|-------|
| 1   | [9.83 .. 9.96] | 0.020 |
| 2   | [3.31 .. 3.38] | 0.057 |
| 3   | [1.17 .. 2.08] | 0.656 |

1-[(1-methoxycycloheptyl)peroxy]cyclohexyl hydroperoxide (**3e**)

|                               |                                                                                                        |                               |                                                    |                     |                     |
|-------------------------------|--------------------------------------------------------------------------------------------------------|-------------------------------|----------------------------------------------------|---------------------|---------------------|
| <b>Acquisition Time (sec)</b> | 0.3359                                                                                                 | <b>Comment</b>                | /TERN IODID674.C13 Opr:Struchkova M.I.;Solv:CDCl3; | <b>Date</b>         | 16/01/2008 19:10:33 |
| <b>File Name</b>              | C:\Documents and Settings\Пользователь\Мои документы\Документы\Платонов\Спектры фиды\tern\iodid674.c13 |                               | <b>Frequency (MHz)</b>                             | 50.32               |                     |
| <b>Nucleus</b>                | 13C                                                                                                    | <b>Original Points Count</b>  | 8192                                               | <b>Points Count</b> | 8192                |
| <b>Sweep Width (Hz)</b>       | 12195.12                                                                                               | <b>Temperature (degree C)</b> | 24.000                                             | <b>Solvent</b>      | DMSO-D6             |

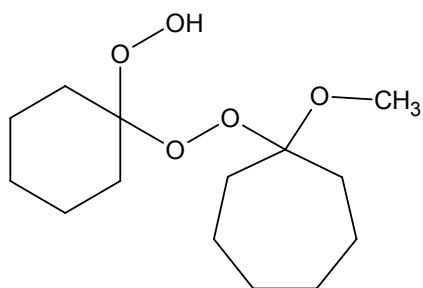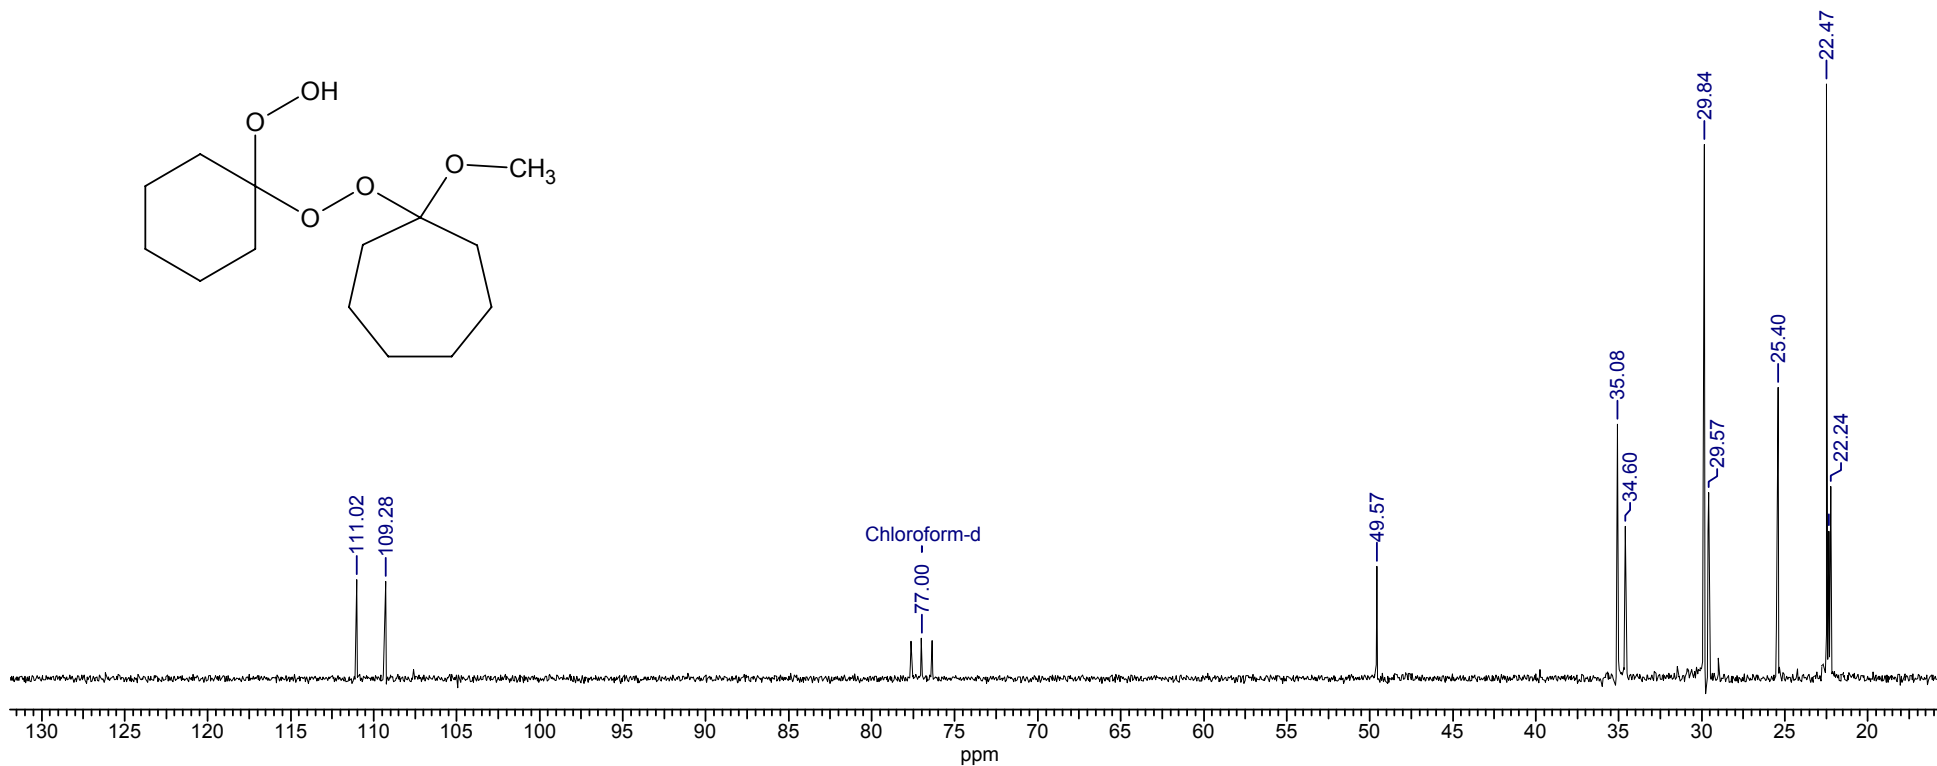

| No. | (ppm) | (Hz)   | Height |
|-----|-------|--------|--------|
| 1   | 22.24 | 1119.1 | 0.3224 |
| 2   | 22.36 | 1125.0 | 0.2475 |
| 3   | 22.47 | 1131.0 | 1.0000 |
| 4   | 25.40 | 1278.4 | 0.4897 |
| 5   | 29.57 | 1488.3 | 0.3126 |
| 6   | 29.84 | 1501.7 | 0.8985 |
| 7   | 29.90 | 1504.7 | 0.2251 |

| No. | (ppm)  | (Hz)   | Height |
|-----|--------|--------|--------|
| 8   | 34.60  | 1741.4 | 0.2551 |
| 9   | 35.08  | 1765.2 | 0.4277 |
| 10  | 49.57  | 2494.8 | 0.1882 |
| 11  | 77.00  | 3874.9 | 0.0670 |
| 12  | 109.28 | 5499.2 | 0.1623 |
| 13  | 111.02 | 5587.1 | 0.1653 |

| No. | Annotation   | (ppm) |
|-----|--------------|-------|
| 1   | Chloroform-d | 77.00 |

1-[(1-ethoxycycloheptyl)peroxy]cyclohexyl hydroperoxide (**3f**)

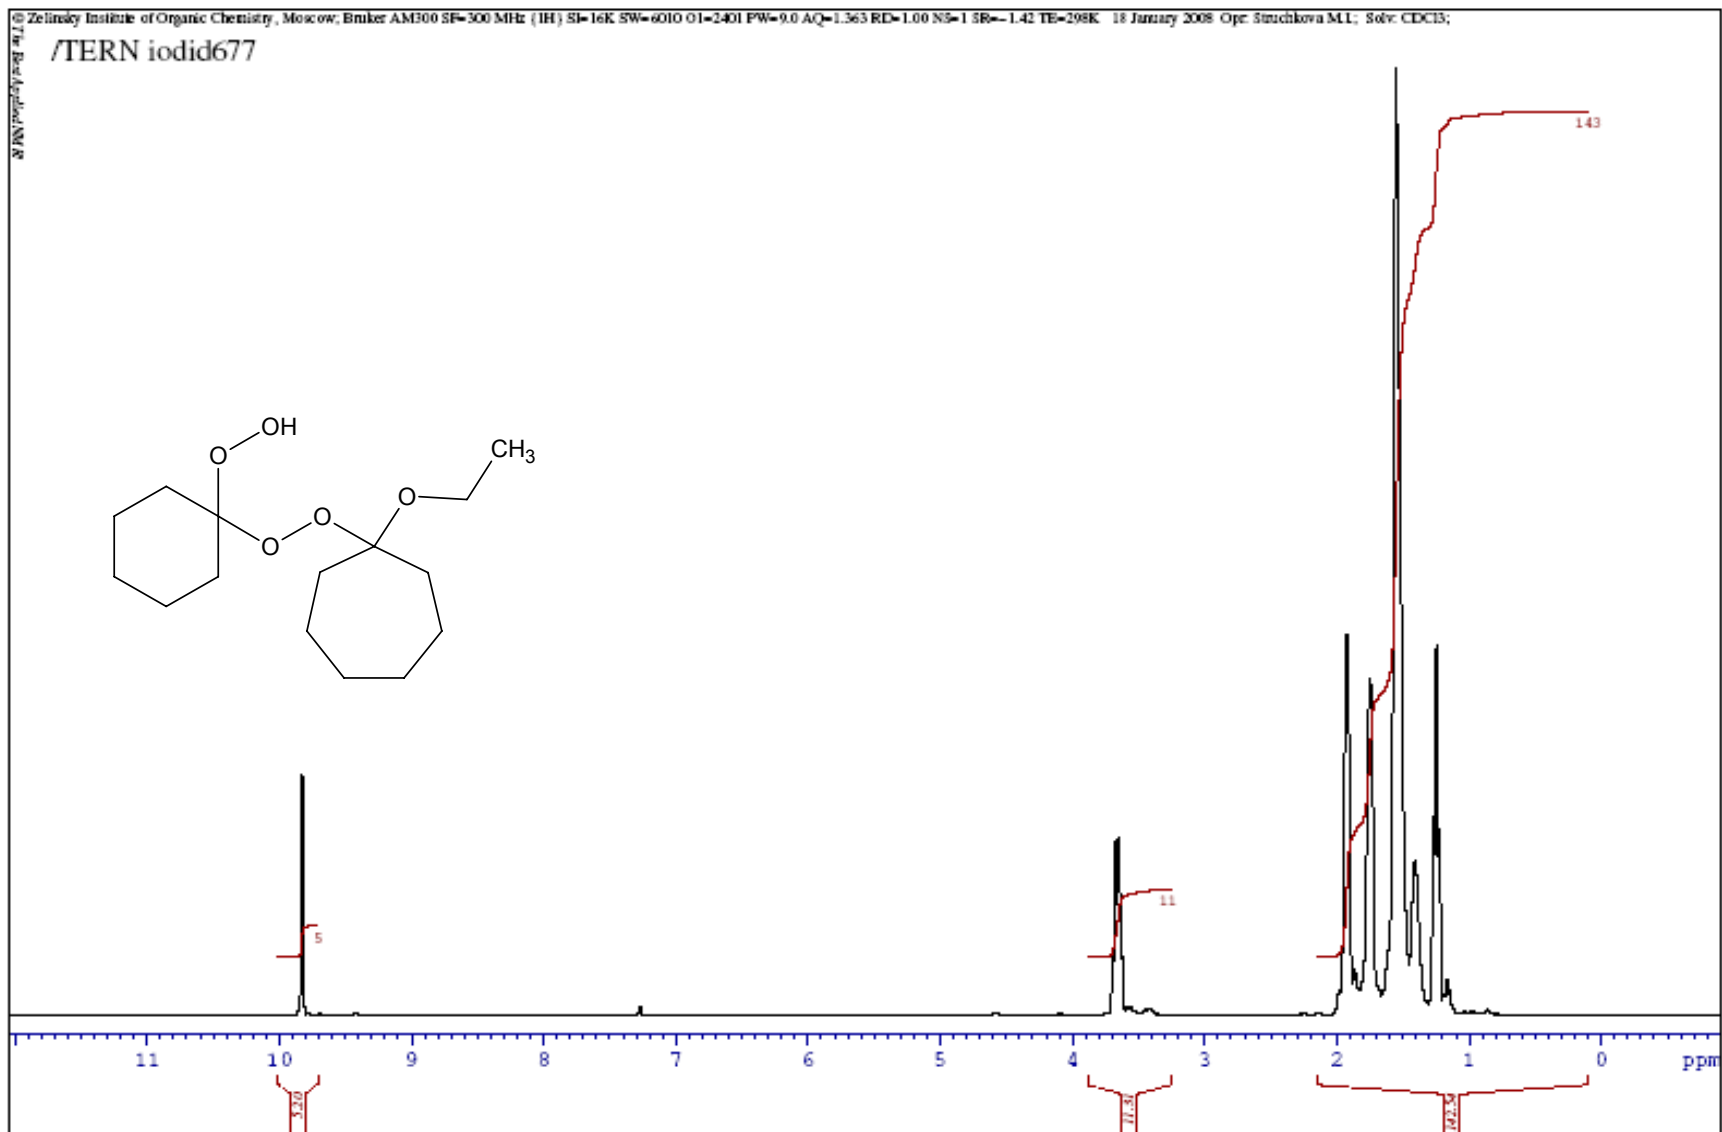

1-[(1-ethoxycycloheptyl)peroxy]cyclohexyl hydroperoxide (**3f**)

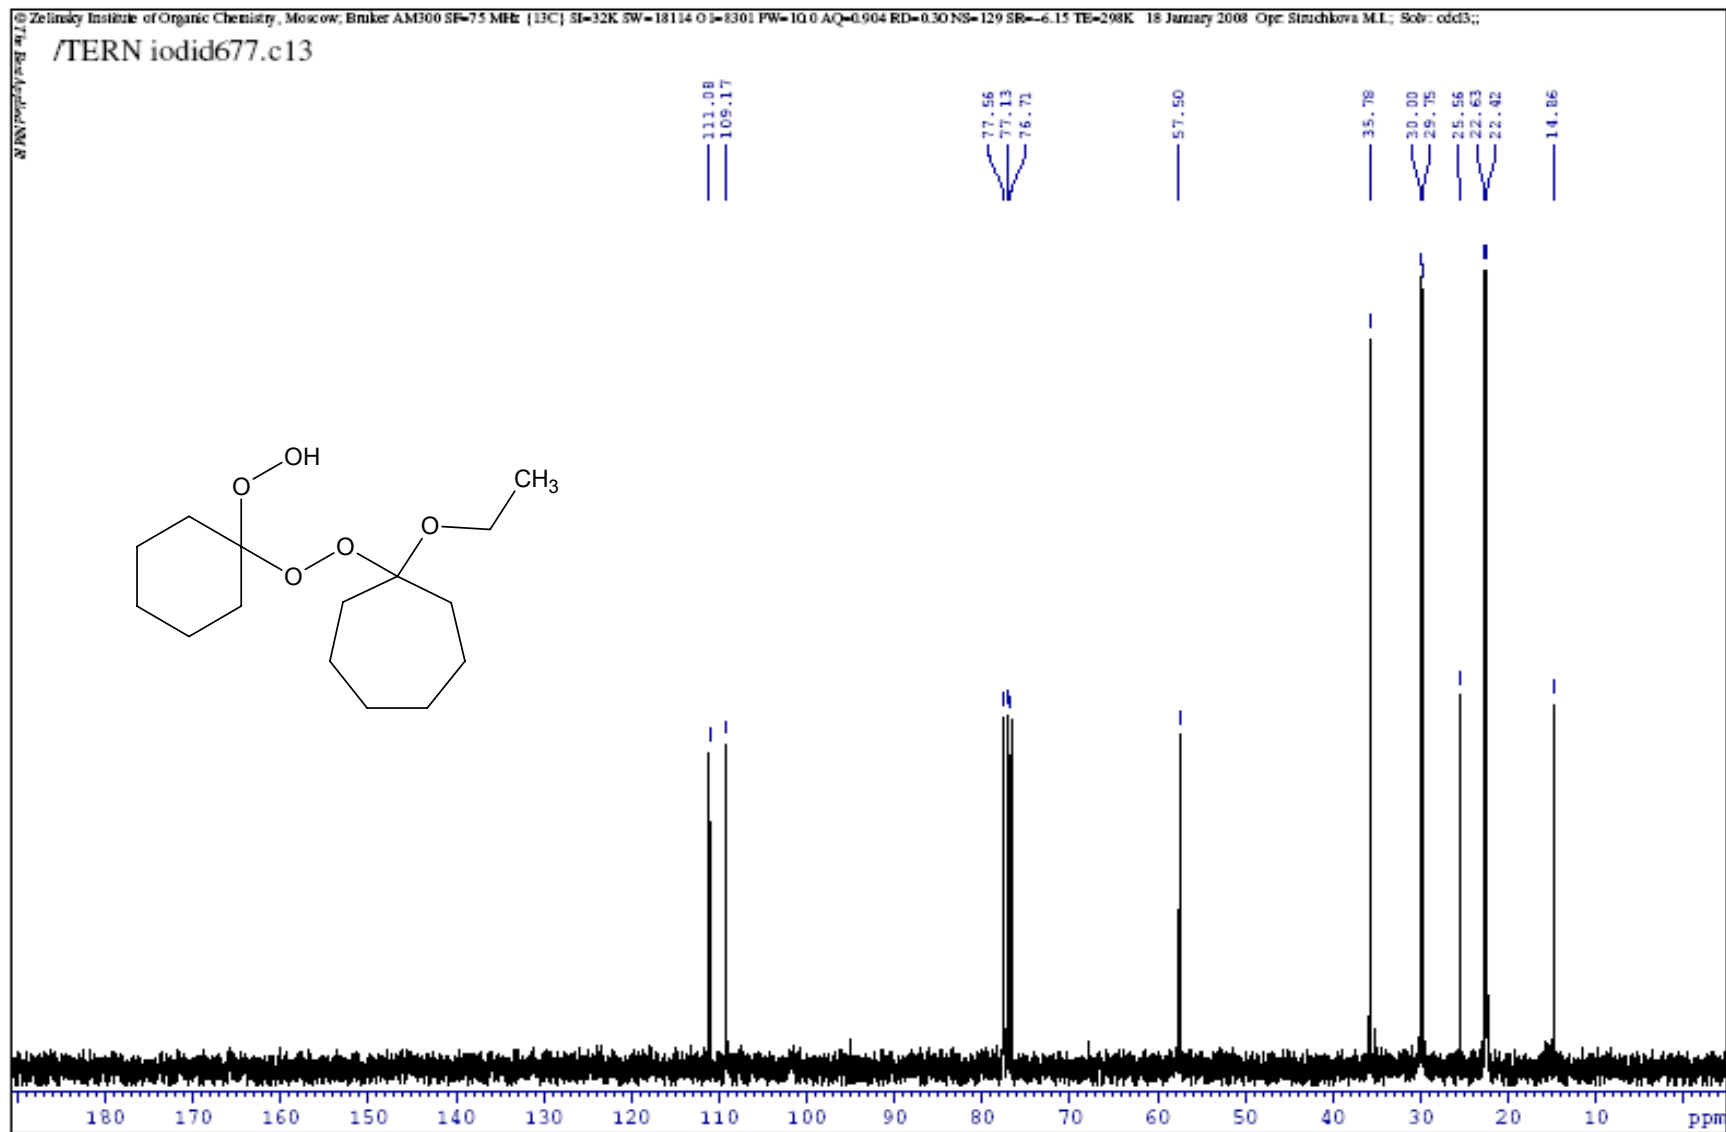

1-[(1-methoxy-1-methylethyl)peroxy]-4-methylcyclohexyl hydroperoxide (**4a**)

|                               |                                                                                                                                       |                       |                   |                             |                      |
|-------------------------------|---------------------------------------------------------------------------------------------------------------------------------------|-----------------------|-------------------|-----------------------------|----------------------|
| <b>Acquisition Time (sec)</b> | 0.6759                                                                                                                                | <b>Comment</b>        | Avance-300, CDCl3 | <b>Date</b>                 | 20 Feb 2008 12:52:16 |
| <b>File Name</b>              | C:\Documents and Settings\Пользователь\Мои документы\Документы Платонов\Спектры фиды\plam\gemp176.001.{1H}\gemp176.001.{1H}_001000fid |                       |                   |                             |                      |
| <b>Frequency (MHz)</b>        | 300.13                                                                                                                                | <b>Nucleus</b>        | <sup>1</sup> H    | <b>Number of Transients</b> | 1                    |
| <b>Points Count</b>           | 8192                                                                                                                                  | <b>Pulse Sequence</b> | zg                | <b>Solvent</b>              | CHLOROFORM-D         |
| <b>Temperature (degree C)</b> | 22.500                                                                                                                                |                       |                   | <b>Sweep Width (Hz)</b>     | 6009.62              |

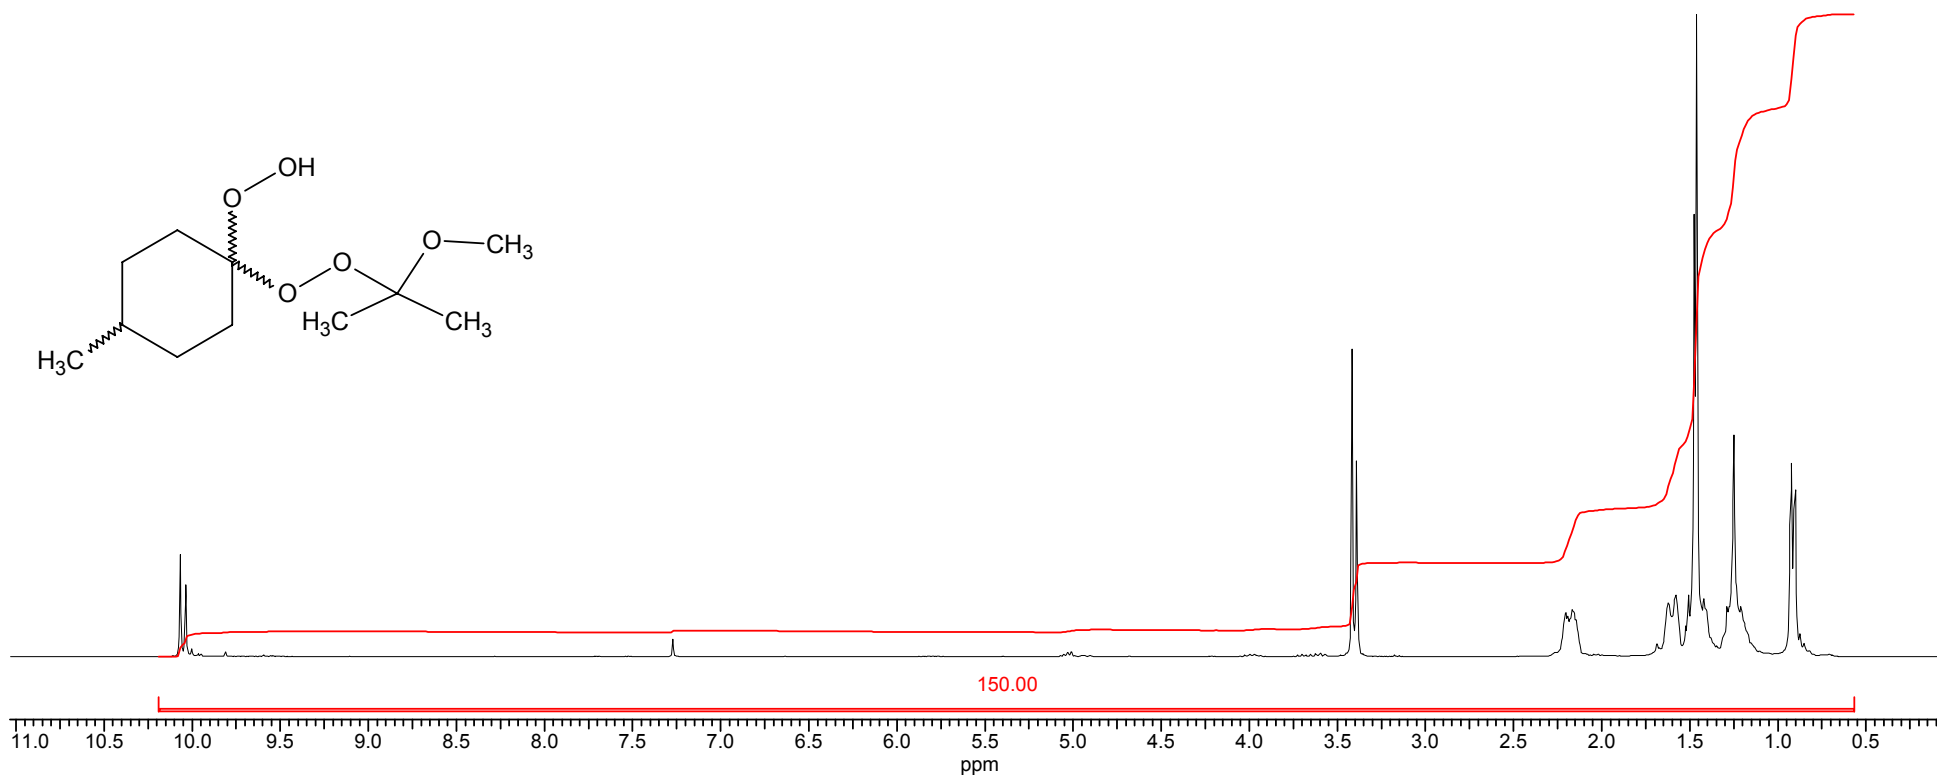

| No. | (ppm)      | Value   |
|-----|------------|---------|
| 1   | 57 .. 10.1 | 150.000 |

1-[(1-methoxy-1-methylethyl)peroxy]-4-methylcyclohexyl hydroperoxide (**4a**)

|                               |                                                                                                                                         |                       |                         |                             |              |                              |          |
|-------------------------------|-----------------------------------------------------------------------------------------------------------------------------------------|-----------------------|-------------------------|-----------------------------|--------------|------------------------------|----------|
| <b>Acquisition Time (sec)</b> | 0.4501                                                                                                                                  | <b>Comment</b>        | Avance-300, C-13, CDCl3 |                             | <b>Date</b>  | 20 Feb 2008 12:54:24         |          |
| <b>File Name</b>              | C:\Documents and Settings\Пользователь\Мои документы\Документы Платонов\Спектры фиды\plam\gemp176.013.{13C}\gemp176.013.{13C}_013000fid |                       |                         |                             |              |                              |          |
| <b>Frequency (MHz)</b>        | 75.48                                                                                                                                   | <b>Nucleus</b>        | 13C                     | <b>Number of Transients</b> | 1032         | <b>Original Points Count</b> | 16308    |
| <b>Points Count</b>           | 16384                                                                                                                                   | <b>Pulse Sequence</b> | zpgp30base              | <b>Solvent</b>              | CHLOROFORM-D | <b>Sweep Width (Hz)</b>      | 18115.94 |
| <b>Temperature (degree C)</b> | 22.600                                                                                                                                  |                       |                         |                             |              |                              |          |

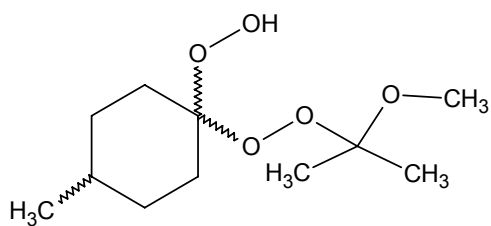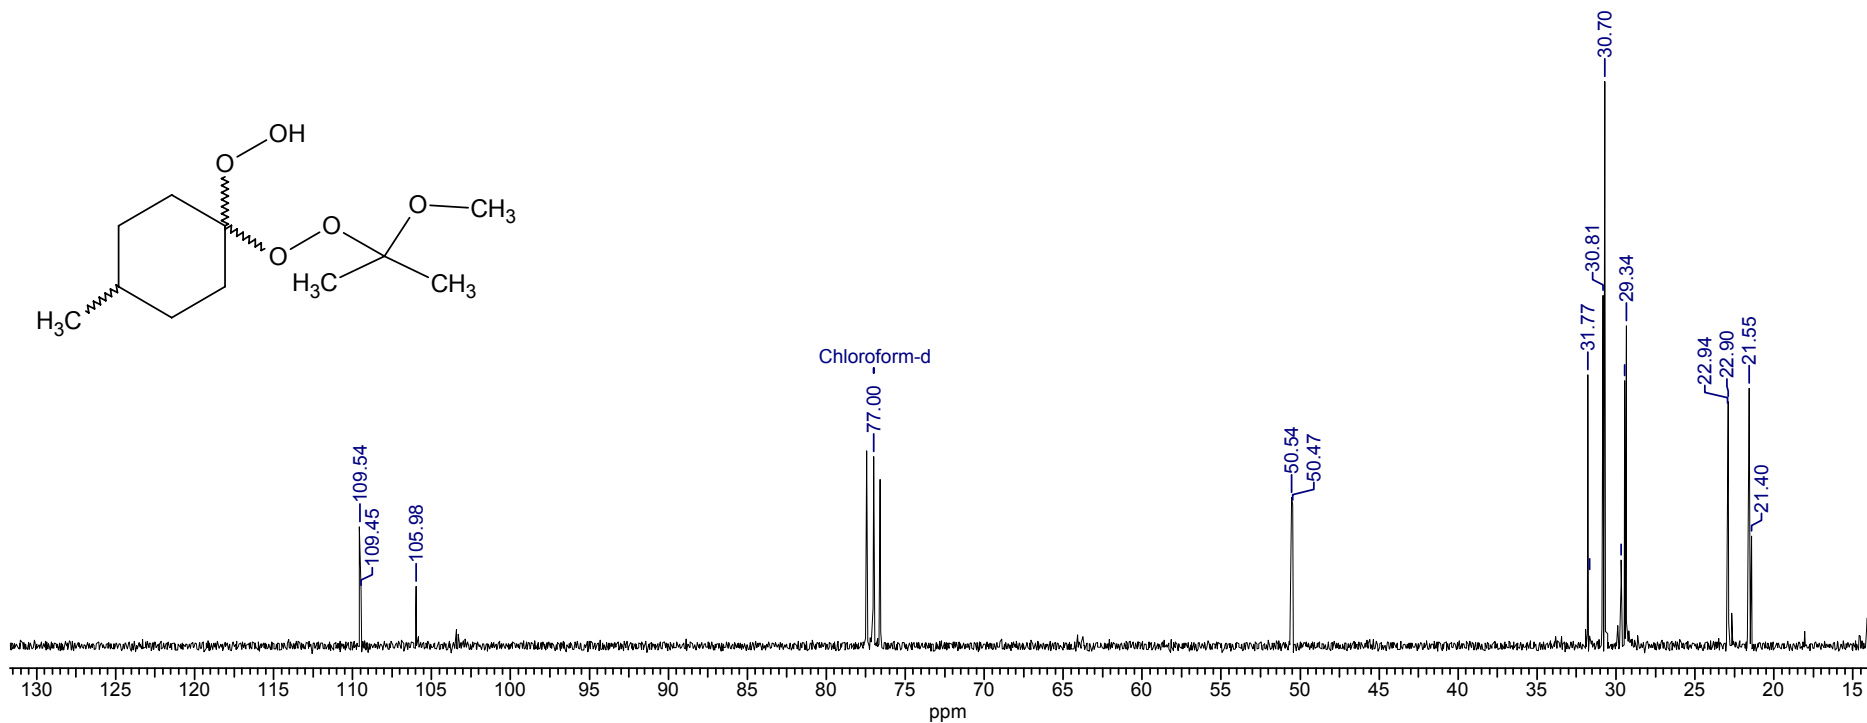

| No. | (ppm) | (Hz)   | Height | No. | (ppm)  | (Hz)   | Height |
|-----|-------|--------|--------|-----|--------|--------|--------|
| 1   | 21.40 | 1615.3 | 0.1948 | 10  | 31.67  | 2390.4 | 0.1264 |
| 2   | 21.55 | 1626.3 | 0.4567 | 11  | 31.77  | 2398.2 | 0.4805 |
| 3   | 22.90 | 1728.0 | 0.4329 | 12  | 50.47  | 3809.1 | 0.2500 |
| 4   | 22.94 | 1731.4 | 0.4212 | 13  | 50.54  | 3814.7 | 0.2635 |
| 5   | 29.34 | 2214.6 | 0.5671 | 14  | 77.00  | 5811.7 | 0.3359 |
| 6   | 29.44 | 2222.3 | 0.4701 | 15  | 105.98 | 7998.9 | 0.1054 |
| 7   | 29.66 | 2238.9 | 0.1526 | 16  | 109.45 | 8261.0 | 0.0981 |
| 8   | 30.70 | 2317.4 | 1.0000 | 17  | 109.54 | 8267.6 | 0.2118 |
| 9   | 30.81 | 2325.2 | 0.6214 |     |        |        |        |

| No. | Annotation   | (ppm) |
|-----|--------------|-------|
| 1   | Chloroform-d | 77.00 |

1-[(1-methoxy-1-methyloctyl)peroxy]-4-methylcyclohexyl hydroperoxide (**4b**)

|                               |                                                                                                    |                             |                                                   |                               |                     |
|-------------------------------|----------------------------------------------------------------------------------------------------|-----------------------------|---------------------------------------------------|-------------------------------|---------------------|
| <b>Acquisition Time (sec)</b> | 1.0240                                                                                             | <b>Comment</b>              | /TERN IODID686 □ Opr:Struchkova M.I.; Solv:CDCl3; | <b>Date</b>                   | 23/01/2008 17:53:42 |
| <b>File Name</b>              | C:\Documents and Settings\Пользователь\Мои документы\Документы\Платонов\Спектры фиды\tern\iodid686 |                             |                                                   | <b>Frequency (MHz)</b>        | 200.13              |
| <b>Nucleus</b>                | 1H                                                                                                 | <b>Number of Transients</b> | 12                                                | <b>Original Points Count</b>  | 8192                |
| <b>Solvent</b>                | DMSO-D6                                                                                            | <b>Sweep Width (Hz)</b>     | 4000.00                                           | <b>Temperature (degree C)</b> | 24.000              |

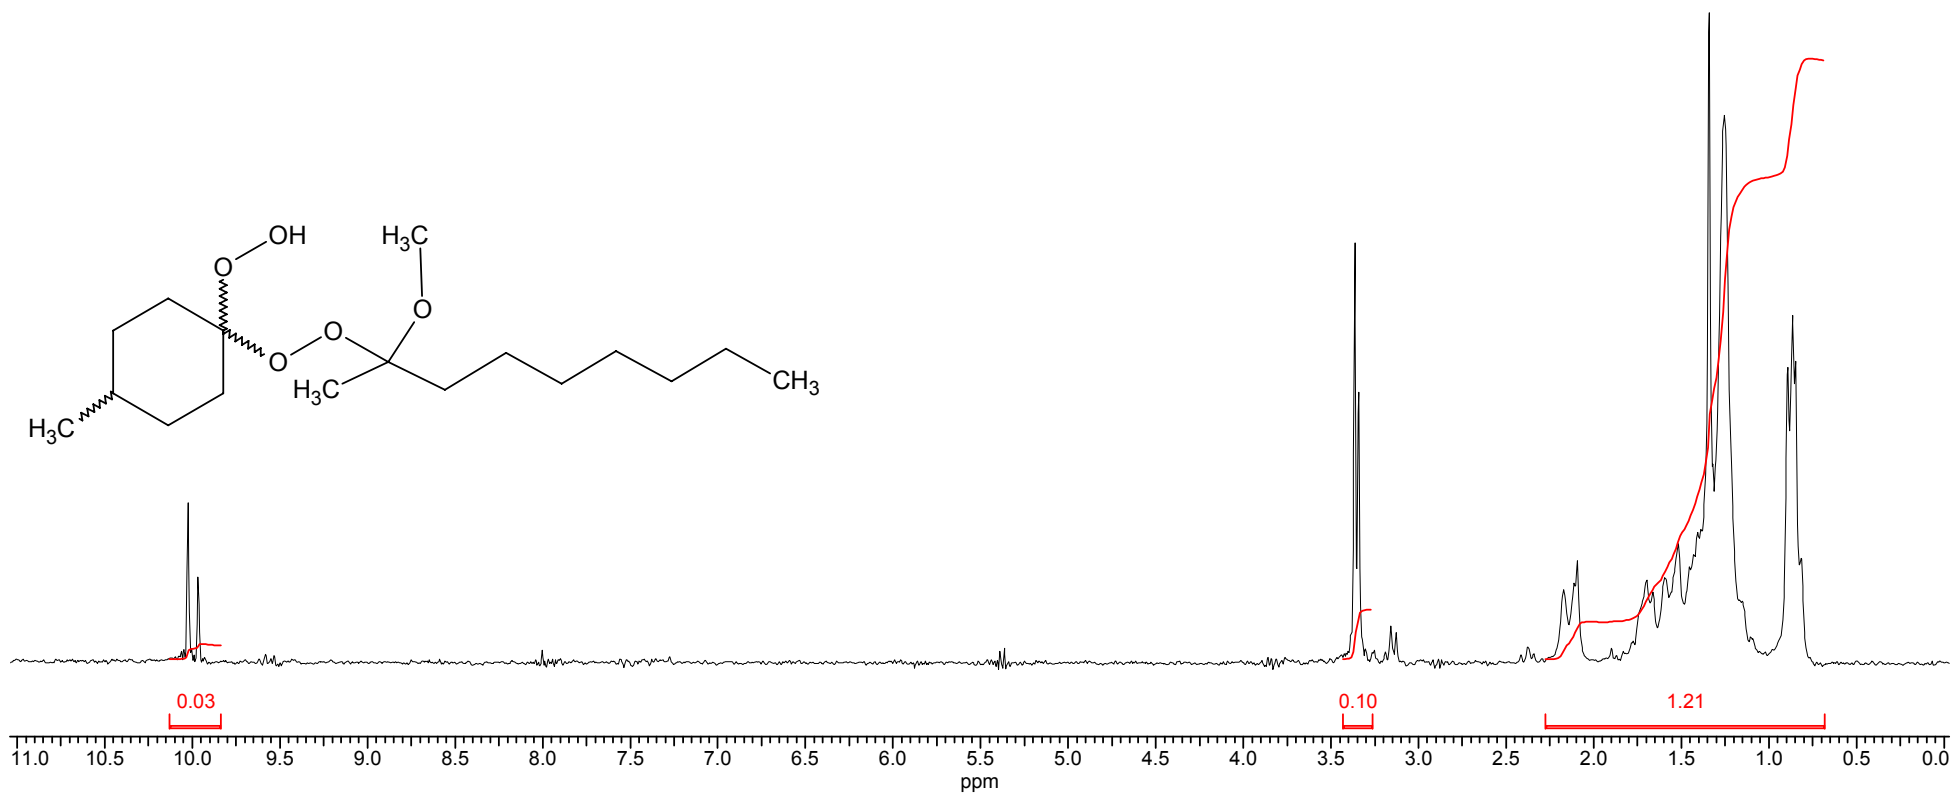

| No. | (ppm)       | Value |
|-----|-------------|-------|
| 1   | 0.68 .. 2.2 | 1.215 |
| 2   | 2.26 .. 3.4 | 0.102 |
| 3   | 8.4 .. 10.1 | 0.028 |

1-[(1-methoxy-1-methyloctyl)peroxy]-4-methylcyclohexyl hydroperoxide (**4b**)

|                        |                                                                                                        |                        |                                                      |                 |                     |
|------------------------|--------------------------------------------------------------------------------------------------------|------------------------|------------------------------------------------------|-----------------|---------------------|
| Acquisition Time (sec) | 0.3359                                                                                                 | Comment                | /TERN IODID686.C13; Opr:Struchkova M.I.; Solv:CDCl3; | Date            | 23/01/2008 18:37:46 |
| File Name              | C:\Documents and Settings\Пользователь\Мои документы\Документы\Платонов\Спектры фиды\tern\iodid686.c13 |                        |                                                      | Frequency (MHz) | 50.32               |
| Nucleus                | 13C                                                                                                    | Original Points Count  | 8192                                                 | Points Count    | 8192                |
| Sweep Width (Hz)       | 12195.12                                                                                               | Temperature (degree C) | 24.000                                               | Solvent         | DMSO-D6             |

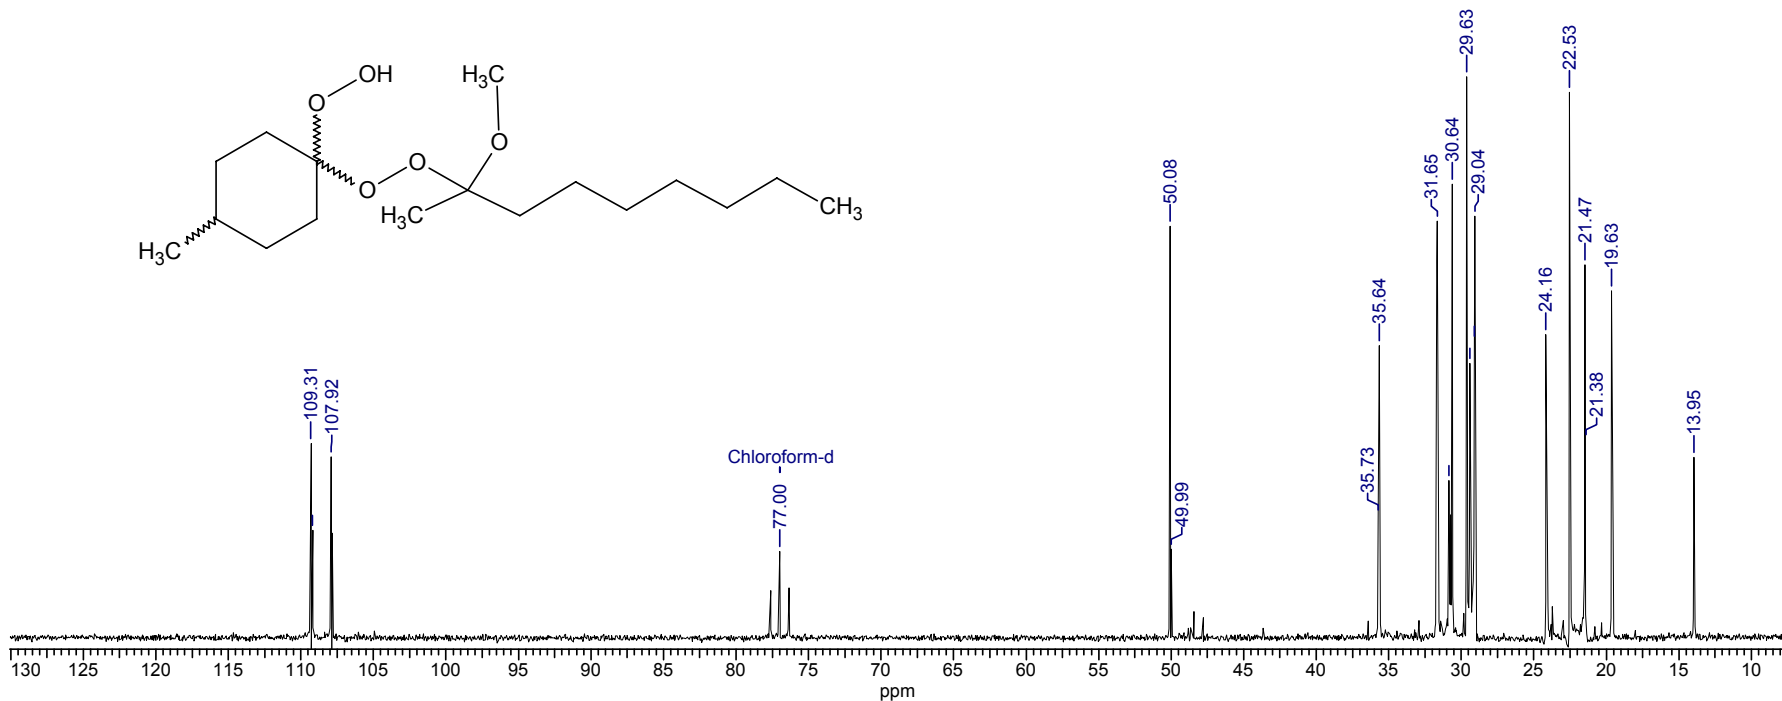

| No. | (ppm)  | (Hz)   | Height |
|-----|--------|--------|--------|
| 1   | 13.95  | 702.2  | 0.3210 |
| 2   | 19.55  | 983.6  | 0.1912 |
| 3   | 19.63  | 988.0  | 0.6181 |
| 4   | 21.38  | 1075.9 | 0.3528 |
| 5   | 21.47  | 1080.3 | 0.6648 |
| 6   | 22.53  | 1133.9 | 0.9725 |
| 7   | 24.16  | 1215.8 | 0.5398 |
| 8   | 29.04  | 1461.5 | 0.7513 |
| 9   | 29.10  | 1464.5 | 0.5277 |
| 10  | 29.16  | 1467.4 | 0.4646 |
| 11  | 29.40  | 1479.4 | 0.4884 |
| 12  | 29.63  | 1491.3 | 1.0000 |
| 13  | 30.64  | 1541.9 | 0.8083 |
| 14  | 30.85  | 1552.3 | 0.2789 |
| 15  | 31.65  | 1592.5 | 0.7427 |
| 16  | 35.64  | 1793.5 | 0.5206 |
| 17  | 35.73  | 1798.0 | 0.2185 |
| 18  | 49.99  | 2515.6 | 0.1568 |
| 19  | 50.08  | 2520.1 | 0.7334 |
| 20  | 77.00  | 3874.9 | 0.1531 |
| 21  | 107.92 | 5430.8 | 0.3214 |
| 22  | 109.19 | 5494.8 | 0.1908 |
| 23  | 109.31 | 5500.7 | 0.3458 |

| No. | Annotation   | (ppm) |
|-----|--------------|-------|
| 1   | Chloroform-d | 77.00 |



1-[(1-methoxy-1-methyloctyl)peroxy]-4-methylcyclohexyl hydroperoxide (**4b**)

|                        |                                                                                                     |                        |                                                     |                 |                     |
|------------------------|-----------------------------------------------------------------------------------------------------|------------------------|-----------------------------------------------------|-----------------|---------------------|
| Acquisition Time (sec) | 0.3523                                                                                              | Comment                | /TERN IODID686.J \ Opr:Struchkova M.I.; Solv:CDCl3; | Date            | 23/01/2008 18:57:47 |
| File Name              | C:\Documents and Settings\Пользователь\Мои документы\Документы\Платонов\Спектры фиды\terniodid686.j |                        |                                                     | Frequency (MHz) | 50.32               |
| Nucleus                | 13C                                                                                                 | Original Points Count  | 8192                                                | Points Count    | 8192                |
| Sweep Width (Hz)       | 11627.91                                                                                            | Temperature (degree C) | 24.000                                              | Solvent         |                     |

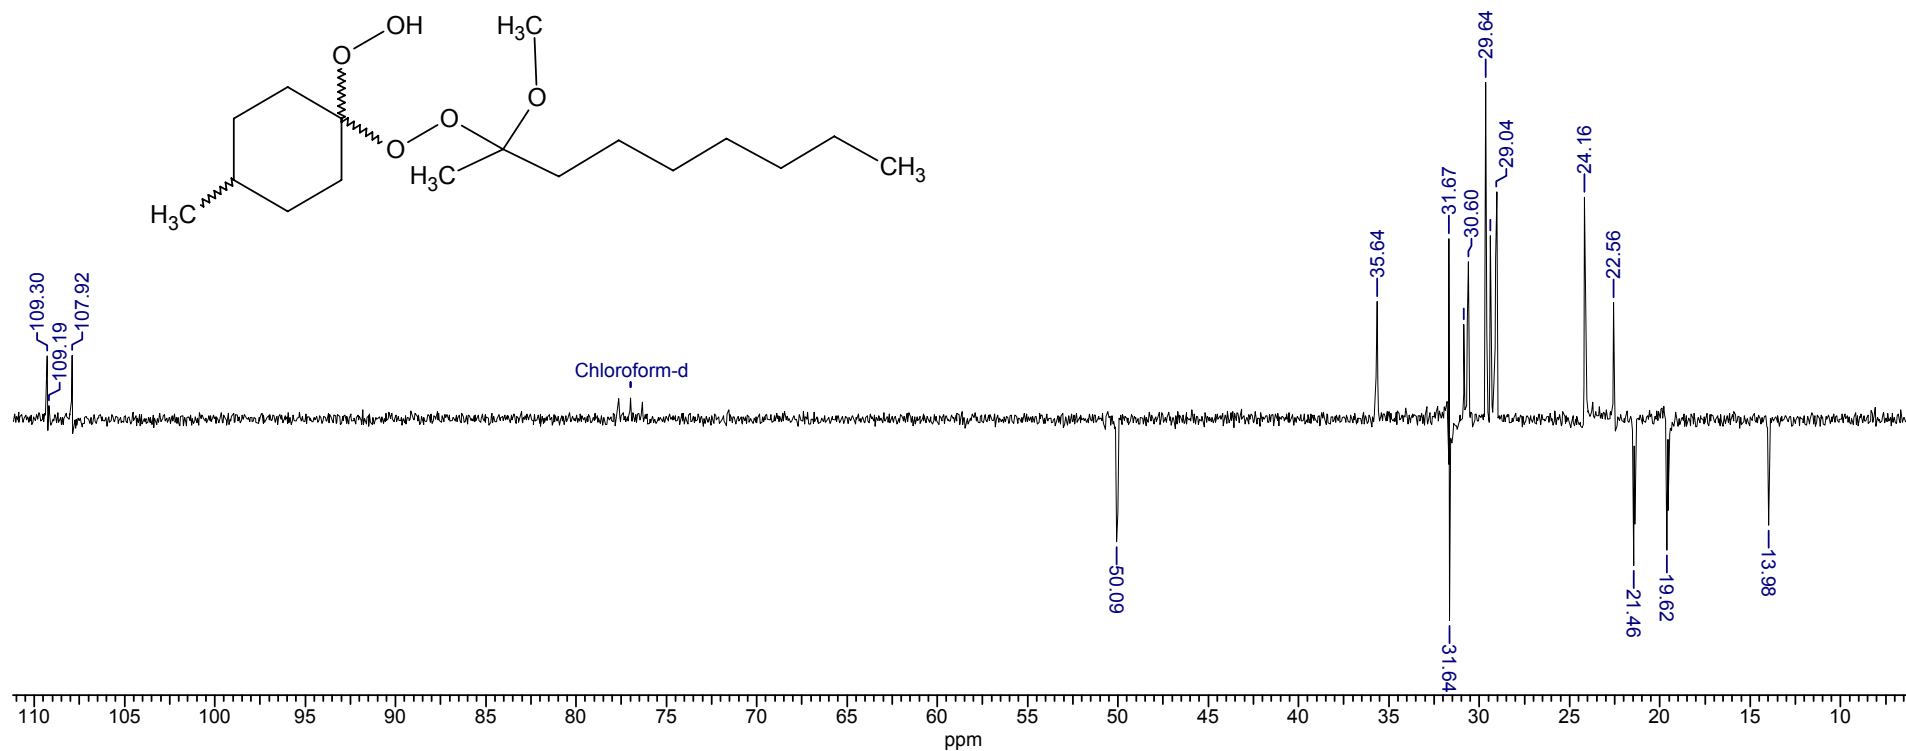

| No. | (ppm) | (Hz)   | Height  | No. | (ppm)  | (Hz)   | Height  |
|-----|-------|--------|---------|-----|--------|--------|---------|
| 1   | 13.98 | 703.5  | -0.3175 | 10  | 30.85  | 1552.4 | 0.2793  |
| 2   | 19.62 | 987.4  | -0.3902 | 11  | 31.64  | 1592.2 | -0.6009 |
| 3   | 21.46 | 1079.7 | -0.4366 | 12  | 31.67  | 1593.6 | 0.5351  |
| 4   | 22.56 | 1135.1 | 0.3441  | 13  | 35.64  | 1793.8 | 0.3484  |
| 5   | 24.16 | 1216.0 | 0.6589  | 14  | 50.09  | 2520.6 | -0.3669 |
| 6   | 29.04 | 1461.6 | 0.6748  | 15  | 107.92 | 5430.8 | 0.1880  |
| 7   | 29.38 | 1478.6 | 0.5432  | 16  | 109.19 | 5494.7 | 0.0384  |
| 8   | 29.64 | 1491.4 | 1.0000  | 17  | 109.30 | 5500.3 | 0.1869  |
| 9   | 30.60 | 1539.7 | 0.4666  |     |        |        |         |

| No. | Annotation   | (ppm) |
|-----|--------------|-------|
| 1   | Chloroform-d | 77.00 |

1-[(1-ethoxycyclopentyl)peroxy]-4-methylcyclohexyl hydroperoxide (**4c**)

|                               |                                                                                                                                 |                       |                |                             |                      |
|-------------------------------|---------------------------------------------------------------------------------------------------------------------------------|-----------------------|----------------|-----------------------------|----------------------|
| <b>Acquisition Time (sec)</b> | 0.6759                                                                                                                          | <b>Comment</b>        | levc;091       | <b>Date</b>                 | 08 Feb 2008 14:28:16 |
| <b>File Name</b>              | C:\Documents and Settings\Пользователь\Мои документы\Документы\Платонов\Спектры фиды\tern\iodid629.{1H}\iodid629.{1H}_001000fid |                       |                |                             |                      |
| <b>Frequency (MHz)</b>        | 300.13                                                                                                                          | <b>Nucleus</b>        | <sup>1</sup> H | <b>Number of Transients</b> | 1                    |
| <b>Points Count</b>           | 8192                                                                                                                            | <b>Pulse Sequence</b> | zg             | <b>Solvent</b>              | CHLOROFORM-D         |
| <b>Temperature (degree C)</b> | 30.100                                                                                                                          |                       |                | <b>Sweep Width (Hz)</b>     | 6009.62              |

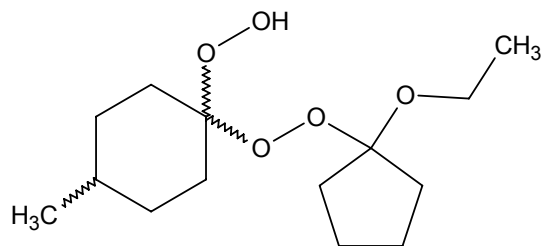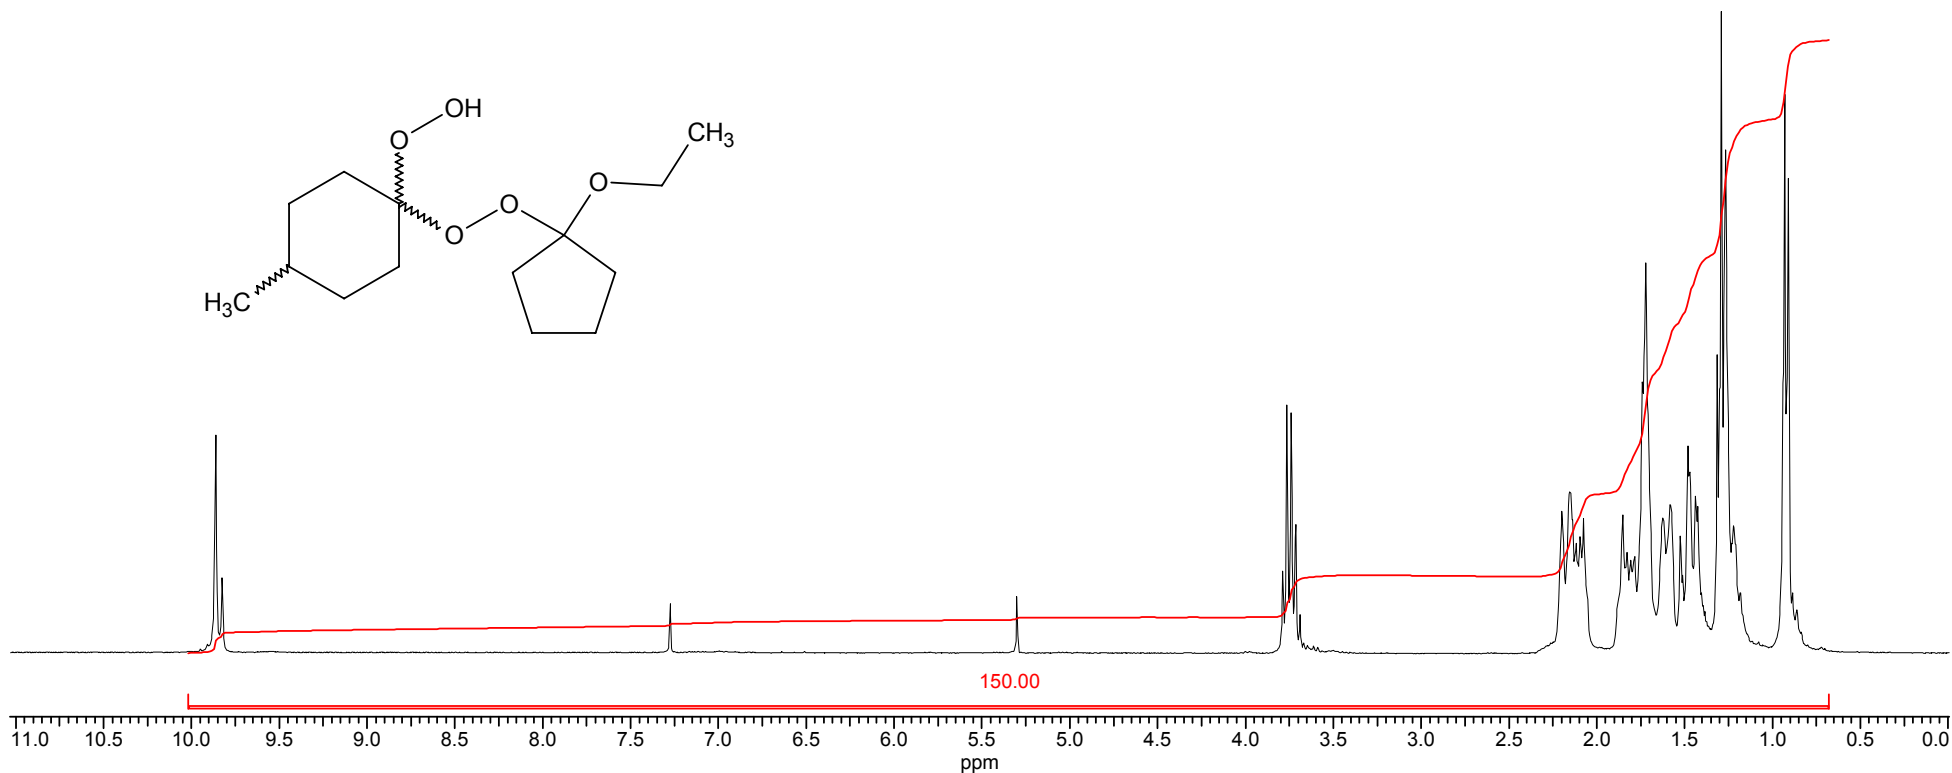

| No. | (ppm)      | Value   |
|-----|------------|---------|
| 1   | 68 .. 10.0 | 150.000 |

1-[(1-ethoxycyclopentyl)peroxy]-4-methylcyclohexyl hydroperoxide (**4c**)

|                               |                                                                                                                                           |                       |                         |                             |              |                              |          |
|-------------------------------|-------------------------------------------------------------------------------------------------------------------------------------------|-----------------------|-------------------------|-----------------------------|--------------|------------------------------|----------|
| <b>Acquisition Time (sec)</b> | 0.4501                                                                                                                                    | <b>Comment</b>        | Avance-300, C-13, CDCI3 |                             | <b>Date</b>  | 11 Feb 2008 12:26:40         |          |
| <b>File Name</b>              | C:\Documents and Settings\Пользователь\Мои документы\Документы\Платонов\Спектры фиды\item\iodid629.013.{13C}\iodid629.013.{13C}_013000fid |                       |                         |                             |              |                              |          |
| <b>Frequency (MHz)</b>        | 75.48                                                                                                                                     | <b>Nucleus</b>        | 13C                     | <b>Number of Transients</b> | 1661         | <b>Original Points Count</b> | 16308    |
| <b>Points Count</b>           | 16384                                                                                                                                     | <b>Pulse Sequence</b> | zgpg30base              | <b>Solvent</b>              | CHLOROFORM-D | <b>Sweep Width (Hz)</b>      | 18115.94 |
| <b>Temperature (degree C)</b> | 20.100                                                                                                                                    |                       |                         |                             |              |                              |          |

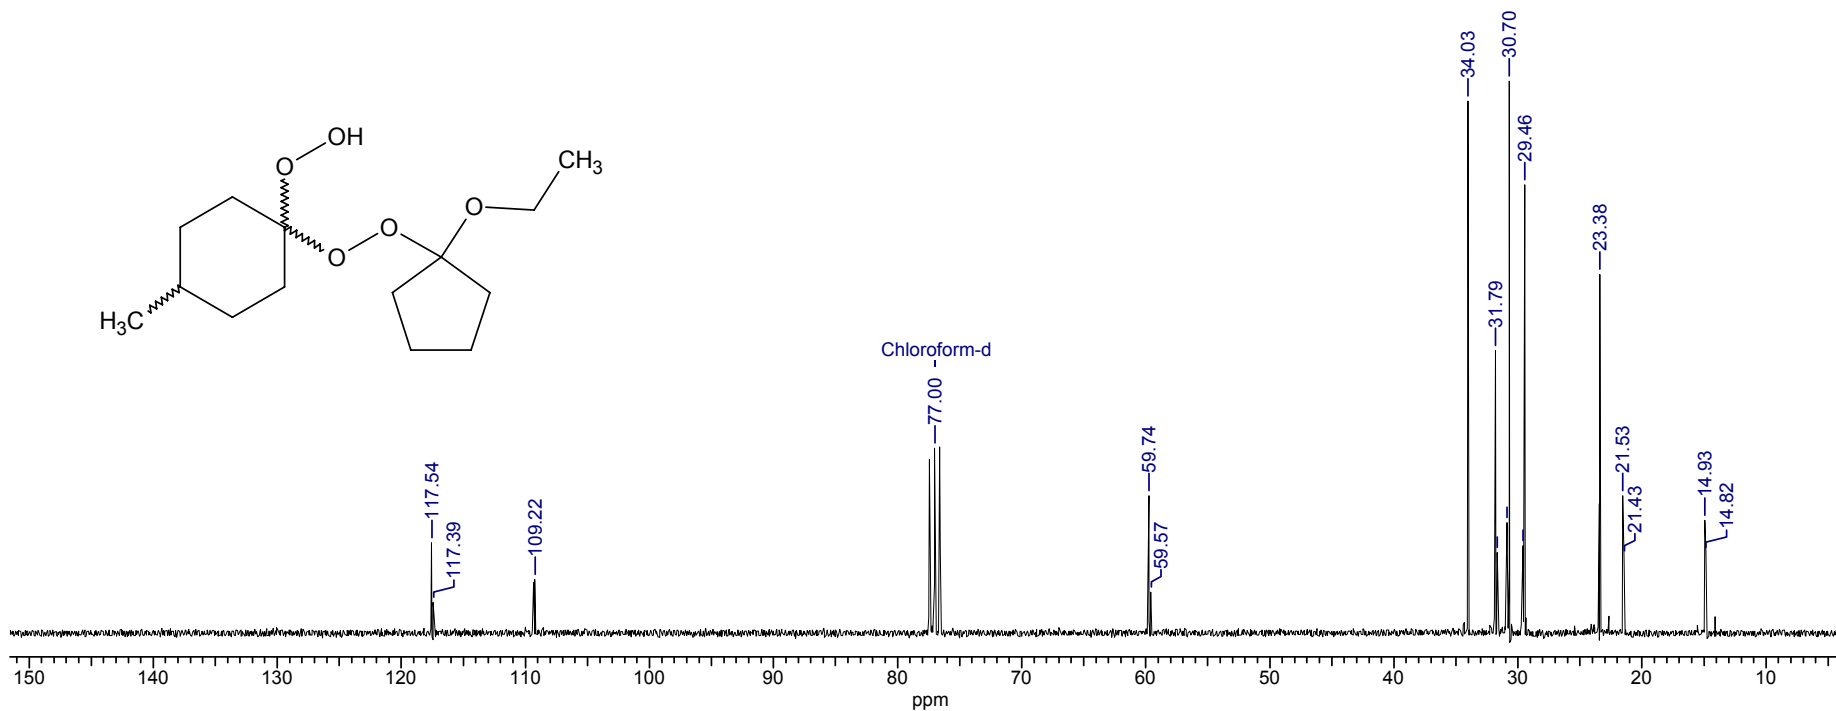

| No. | (ppm) | (Hz)   | Height | No. | (ppm)  | (Hz)   | Height | No. | Annotation   | (ppm) |
|-----|-------|--------|--------|-----|--------|--------|--------|-----|--------------|-------|
| 1   | 14.82 | 1118.8 | 0.1461 | 11  | 31.69  | 2391.5 | 0.1460 | 1   | Chloroform-d | 77.00 |
| 2   | 14.93 | 1126.5 | 0.2037 | 12  | 31.79  | 2399.2 | 0.5120 |     |              |       |
| 3   | 21.43 | 1617.5 | 0.1400 | 13  | 34.03  | 2568.4 | 0.9636 |     |              |       |
| 4   | 21.53 | 1625.2 | 0.2492 | 14  | 59.57  | 4495.8 | 0.0746 |     |              |       |
| 5   | 23.38 | 1764.5 | 0.6503 | 15  | 59.74  | 4509.1 | 0.2491 |     |              |       |
| 6   | 23.45 | 1770.1 | 0.2339 | 16  | 77.00  | 5811.7 | 0.3348 |     |              |       |
| 7   | 29.46 | 2223.4 | 0.8124 | 17  | 109.22 | 8243.3 | 0.0977 |     |              |       |
| 8   | 29.58 | 2232.3 | 0.1586 | 18  | 109.31 | 8249.9 | 0.0920 |     |              |       |
| 9   | 30.70 | 2317.4 | 1.0000 | 19  | 117.39 | 8860.3 | 0.0558 |     |              |       |
| 10  | 30.87 | 2329.6 | 0.1998 | 20  | 117.54 | 8871.4 | 0.1637 |     |              |       |

1-[(1-methoxycyclohexyl)peroxy]-4-methylcyclohexyl hydroperoxide (**4d**)

|                               |                                                                                                                                         |                       |                   |                             |                      |
|-------------------------------|-----------------------------------------------------------------------------------------------------------------------------------------|-----------------------|-------------------|-----------------------------|----------------------|
| <b>Acquisition Time (sec)</b> | 0.6759                                                                                                                                  | <b>Comment</b>        | Avance-300, CDCl3 | <b>Date</b>                 | 10 Jan 2008 09:08:16 |
| <b>File Name</b>              | C:\Documents and Settings\Пользователь\Мои документы\Документы\Платонов\Спектры фиды\tern\iodid650.001.{1H}\iodid650.001.{1H}_001000fid |                       |                   |                             |                      |
| <b>Frequency (MHz)</b>        | 300.13                                                                                                                                  | <b>Nucleus</b>        | 1H                | <b>Number of Transients</b> | 1                    |
| <b>Points Count</b>           | 8192                                                                                                                                    | <b>Pulse Sequence</b> | zg                | <b>Solvent</b>              | CHLOROFORM-D         |
| <b>Temperature (degree C)</b> | 22.900                                                                                                                                  |                       |                   | <b>Sweep Width (Hz)</b>     | 6009.62              |

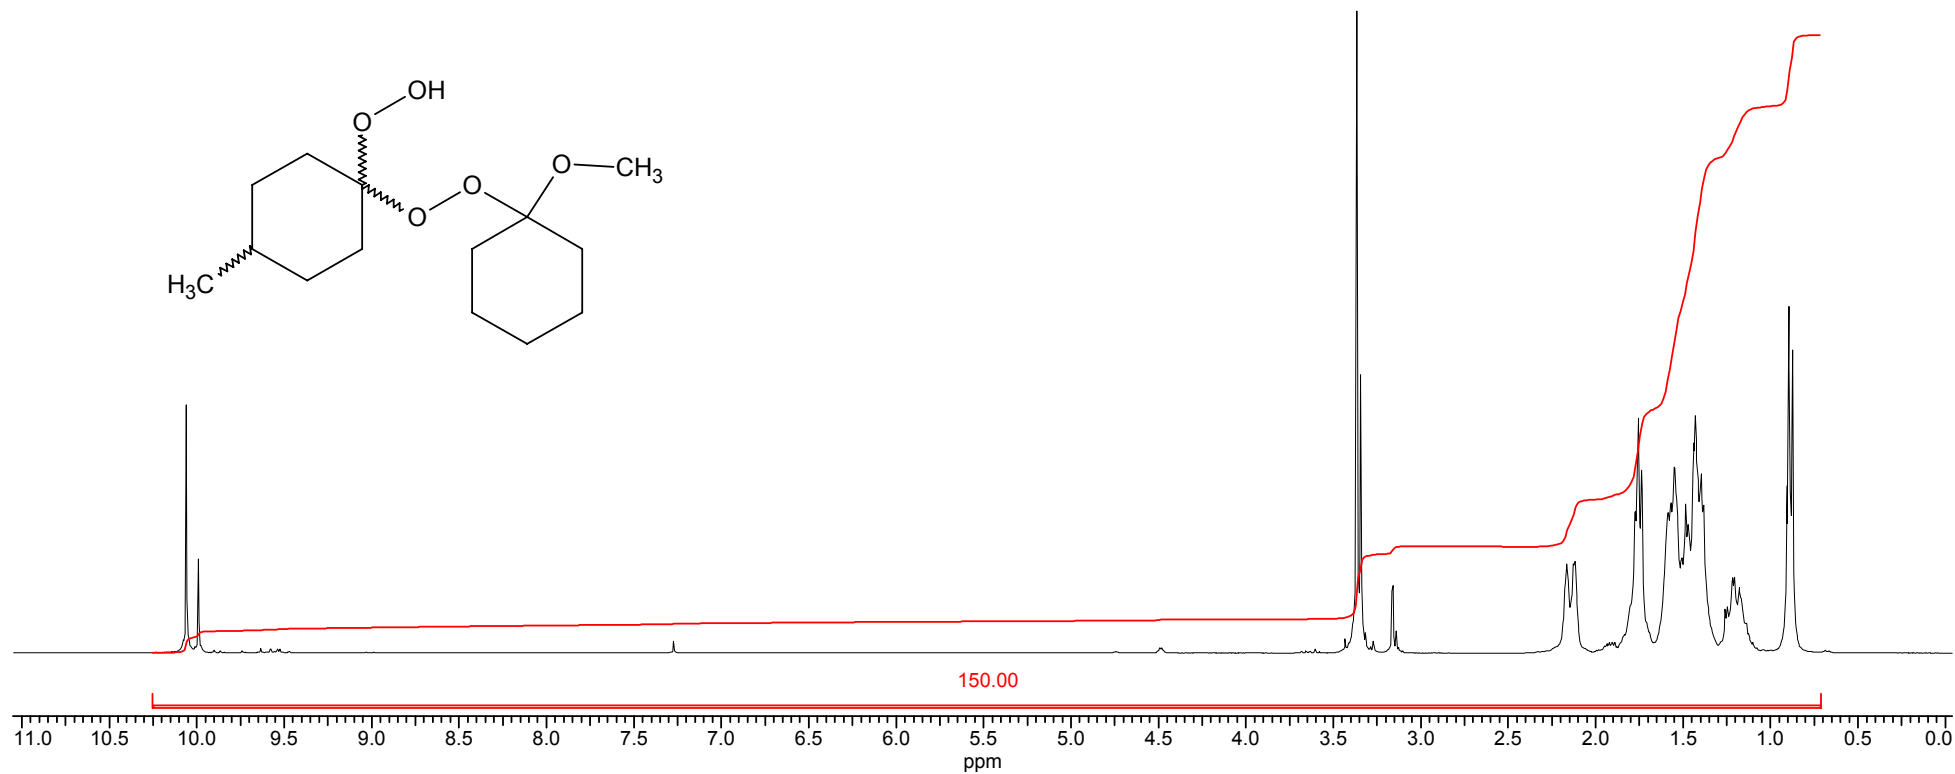

| No. | (ppm)      | Value   |
|-----|------------|---------|
| 1   | 71 .. 10.2 | 150.000 |

1-[(1-methoxycyclohexyl)peroxy]-4-methylcyclohexyl hydroperoxide (**4d**)

|                        |                                                                                                                                           |                       |                         |                      |                      |
|------------------------|-------------------------------------------------------------------------------------------------------------------------------------------|-----------------------|-------------------------|----------------------|----------------------|
| Acquisition Time (sec) | 0.4501                                                                                                                                    | Comment               | Avance-300, C-13, CDCl3 | Date                 | 10 Jan 2008 09:10:24 |
| File Name              | C:\Documents and Settings\Пользователь\Мои документы\Документы\Платонов\Спектры фиды\item\iodid650.013.{13C}\iodid650.013.{13C}_013000fid |                       |                         |                      |                      |
| Frequency (MHz)        | 75.48                                                                                                                                     | Nucleus               | 13C                     | Number of Transients | 661                  |
| Points Count           | 16384                                                                                                                                     | Pulse Sequence        | zgpg30base              | Solvent              | CHLOROFORM-D         |
| Temperature (degree C) | 23.000                                                                                                                                    | Original Points Count | 16308                   | Sweep Width (Hz)     | 18115.94             |

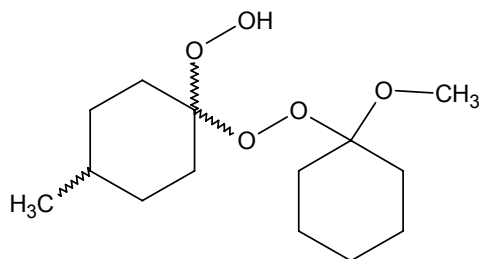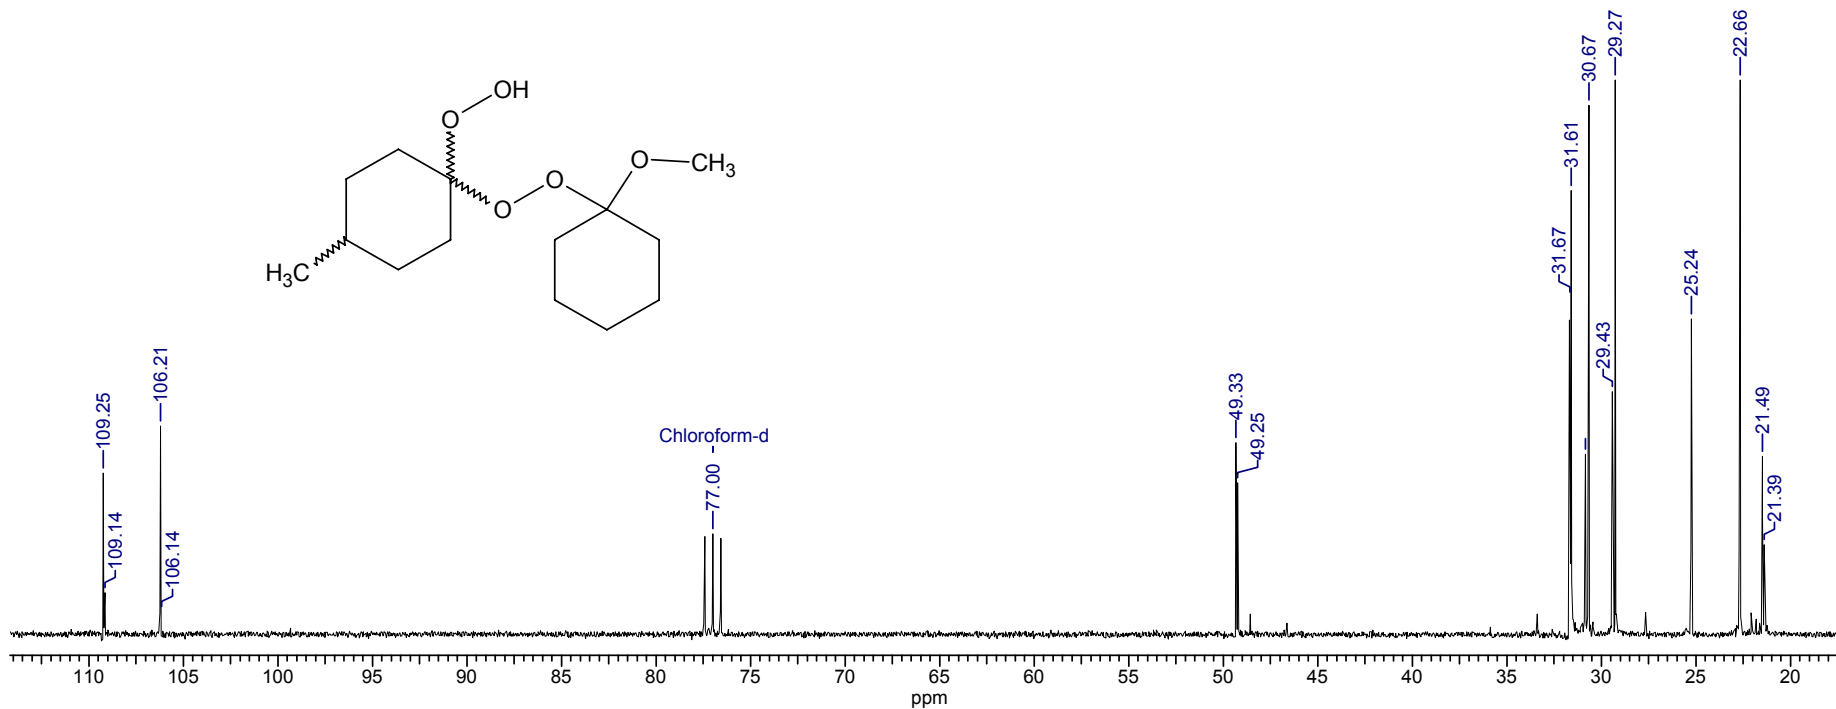

| No. | (ppm) | (Hz)   | Height |
|-----|-------|--------|--------|
| 1   | 21.39 | 1614.1 | 0.1623 |
| 2   | 21.49 | 1621.9 | 0.3211 |
| 3   | 22.66 | 1710.3 | 0.9999 |
| 4   | 22.70 | 1713.7 | 0.3034 |
| 5   | 25.24 | 1905.0 | 0.5692 |
| 6   | 25.28 | 1908.3 | 0.1525 |
| 7   | 29.27 | 2209.1 | 1.0000 |
| 8   | 29.43 | 2221.2 | 0.4378 |
| 9   | 30.67 | 2315.2 | 0.9551 |
| 10  | 30.85 | 2328.5 | 0.3261 |

| No. | (ppm)  | (Hz)   | Height |
|-----|--------|--------|--------|
| 11  | 31.61  | 2386.0 | 0.8013 |
| 12  | 31.67  | 2390.4 | 0.6082 |
| 13  | 31.70  | 2392.6 | 0.5674 |
| 14  | 49.25  | 3717.3 | 0.2740 |
| 15  | 49.33  | 3722.9 | 0.3463 |
| 16  | 77.00  | 5811.7 | 0.1822 |
| 17  | 106.14 | 8011.1 | 0.0420 |
| 18  | 106.21 | 8016.6 | 0.3761 |
| 19  | 109.14 | 8237.7 | 0.0761 |
| 20  | 109.25 | 8245.5 | 0.2912 |

| No. | Annotation   | (ppm) |
|-----|--------------|-------|
| 1   | Chloroform-d | 77.00 |

1-[(1-methoxycycloheptyl)peroxy]-4-methylcyclohexyl hydroperoxide (**4e**)

|                               |                                                                                                                                         |                       |                   |                             |                      |
|-------------------------------|-----------------------------------------------------------------------------------------------------------------------------------------|-----------------------|-------------------|-----------------------------|----------------------|
| <b>Acquisition Time (sec)</b> | 0.6759                                                                                                                                  | <b>Comment</b>        | Avance-300, CDCl3 | <b>Date</b>                 | 14 Jan 2008 14:13:20 |
| <b>File Name</b>              | C:\Documents and Settings\Пользователь\Мои документы\Документы\Платонов\Спектры фиды\tern\iodid658.001.{1H}\iodid658.001.{1H}_001000fid |                       |                   |                             |                      |
| <b>Frequency (MHz)</b>        | 300.13                                                                                                                                  | <b>Nucleus</b>        | 1H                | <b>Number of Transients</b> | 1                    |
| <b>Points Count</b>           | 8192                                                                                                                                    | <b>Pulse Sequence</b> | zg                | <b>Solvent</b>              | CHLOROFORM-D         |
| <b>Temperature (degree C)</b> | 24.400                                                                                                                                  |                       |                   | <b>Sweep Width (Hz)</b>     | 6009.62              |

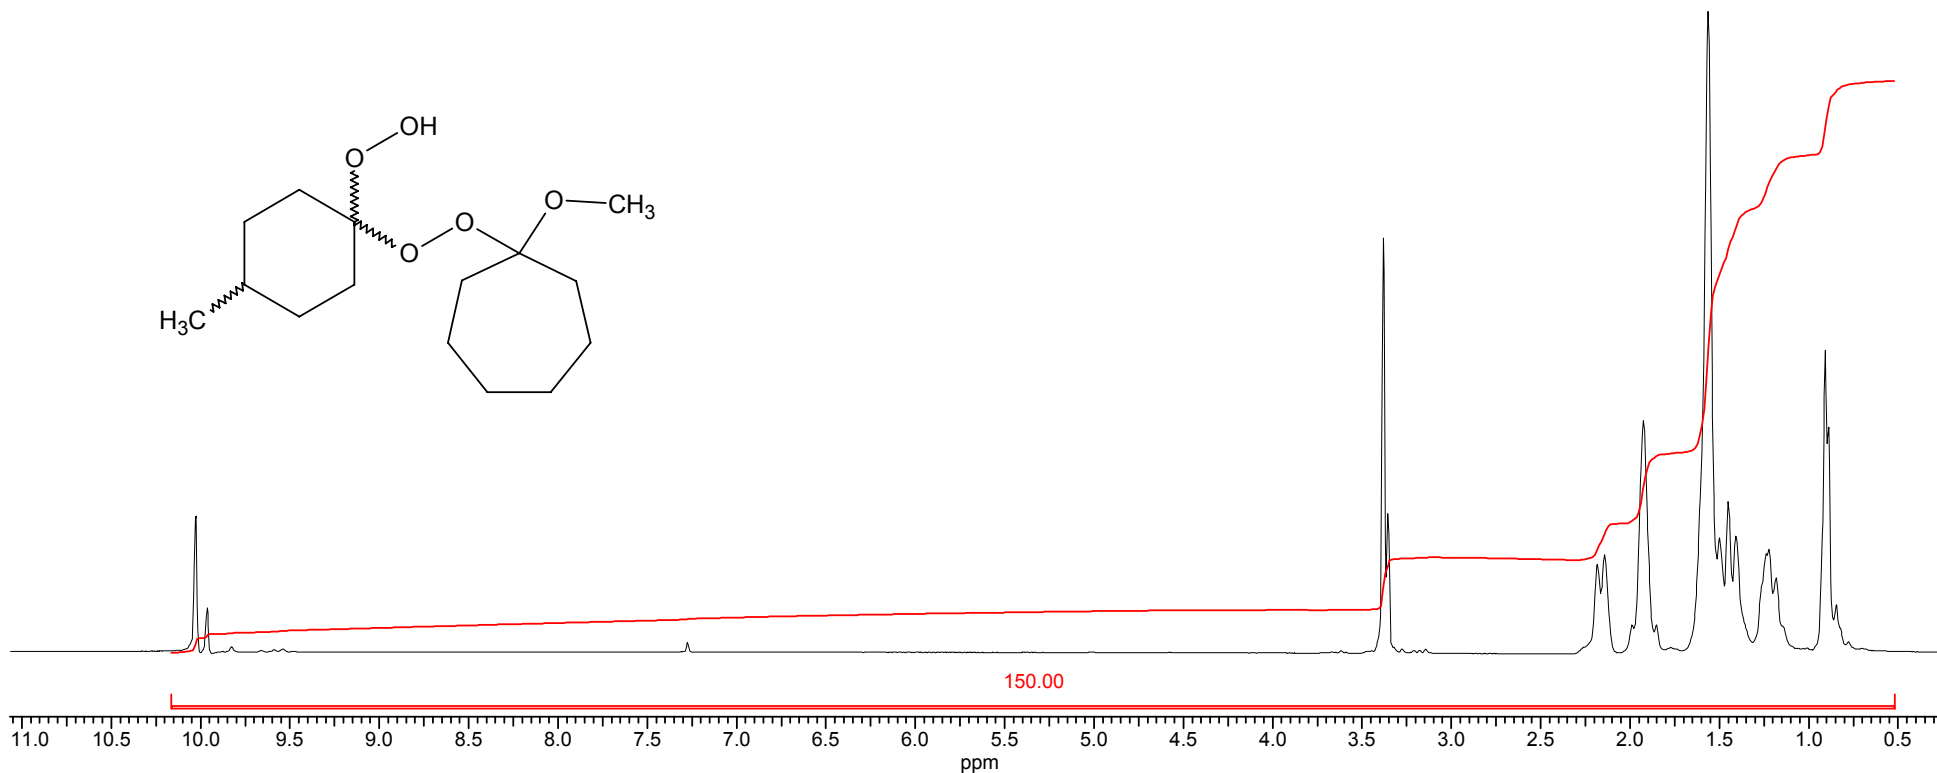

| No. | (ppm)      | Value   |
|-----|------------|---------|
| 1   | 52 .. 10.1 | 150.000 |

1-[(1-methoxycycloheptyl)peroxy]-4-methylcyclohexyl hydroperoxide (**4e**)

|                        |                                                                                                                                           |                  |                         |                      |                      |
|------------------------|-------------------------------------------------------------------------------------------------------------------------------------------|------------------|-------------------------|----------------------|----------------------|
| Acquisition Time (sec) | 0.4501                                                                                                                                    | Comment          | Avance-300, C-13, CDCl3 | Date                 | 15 Jan 2008 11:01:20 |
| File Name              | C:\Documents and Settings\Пользователь\Мои документы\Документы\Платонов\Спектры фиды\item\iodid658.013.{13C}\iodid658.013.{13C}.013000fid |                  |                         |                      |                      |
| Frequency (MHz)        | 75.48                                                                                                                                     | Nucleus          | 13C                     | Number of Transients | 1012                 |
| Points Count           | 16384                                                                                                                                     | Pulse Sequence   | zgpg30base              | Solvent              | CHLOROFORM-D         |
| Temperature (degree C) | 22.100                                                                                                                                    | Sweep Width (Hz) | 18115.94                |                      |                      |

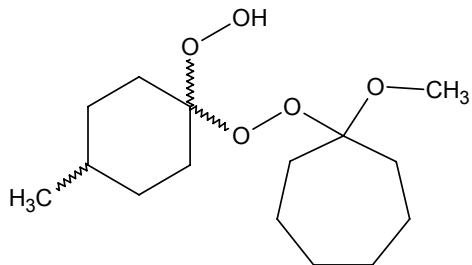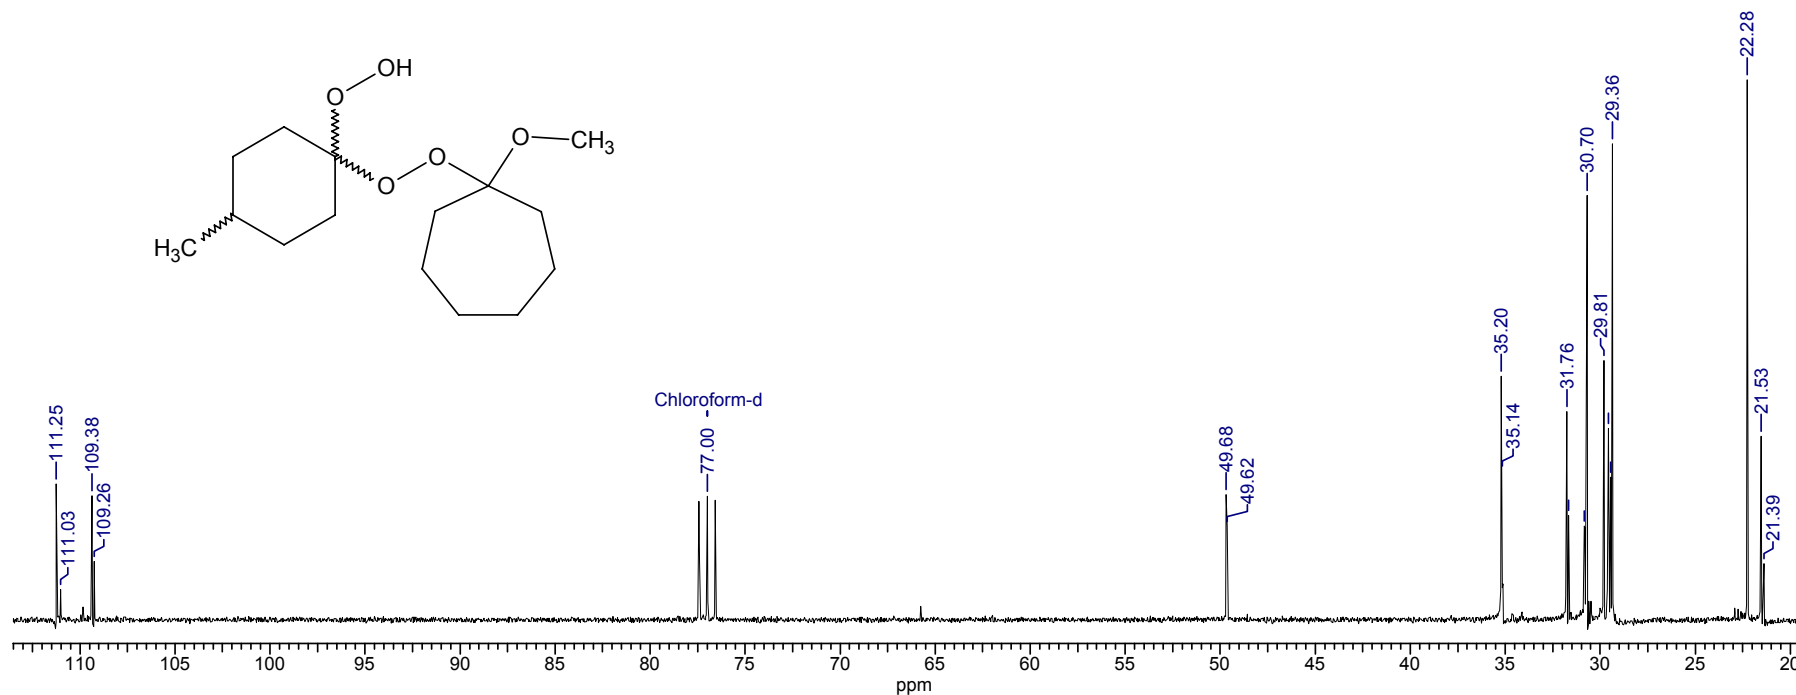

| No. | (ppm) | (Hz)   | Height |
|-----|-------|--------|--------|
| 1   | 21.39 | 1614.1 | 0.1049 |
| 2   | 21.53 | 1625.2 | 0.3403 |
| 3   | 22.25 | 1679.4 | 0.3520 |
| 4   | 22.28 | 1681.6 | 1.0000 |
| 5   | 29.36 | 2215.7 | 0.8816 |
| 6   | 29.44 | 2222.3 | 0.2648 |
| 7   | 29.56 | 2231.2 | 0.3546 |
| 8   | 29.81 | 2250.0 | 0.4808 |
| 9   | 30.70 | 2317.4 | 0.7864 |
| 10  | 30.84 | 2327.4 | 0.1739 |
| 11  | 31.66 | 2389.3 | 0.1935 |

| No. | (ppm)  | (Hz)   | Height |
|-----|--------|--------|--------|
| 12  | 31.76  | 2397.0 | 0.3862 |
| 13  | 35.14  | 2652.5 | 0.2761 |
| 14  | 35.20  | 2656.9 | 0.4513 |
| 15  | 49.62  | 3745.0 | 0.1730 |
| 16  | 49.68  | 3749.4 | 0.2320 |
| 17  | 77.00  | 5811.7 | 0.2294 |
| 18  | 109.26 | 8246.6 | 0.1087 |
| 19  | 109.38 | 8255.4 | 0.2299 |
| 20  | 111.03 | 8380.4 | 0.0570 |
| 21  | 111.25 | 8397.0 | 0.2522 |

| No. | Annotation   | (ppm) |
|-----|--------------|-------|
| 1   | Chloroform-d | 77.00 |

1-[(1-methoxy-1-methylethyl)peroxy]cycloheptyl hydroperoxide (**5a**)

|                               |                                                                                                                               |                       |                      |                             |              |                              |         |
|-------------------------------|-------------------------------------------------------------------------------------------------------------------------------|-----------------------|----------------------|-----------------------------|--------------|------------------------------|---------|
| <b>Acquisition Time (sec)</b> | 0.6759                                                                                                                        | <b>Date</b>           | 22 Feb 2008 10:57:04 |                             |              |                              |         |
| <b>File Name</b>              | C:\Documents and Settings\Пользователь\Мои документы\Документы\Платонов\Спектры фиды\plam\gemp178.{1H}\gemp178.{1H}_001000fid |                       |                      |                             |              |                              |         |
| <b>Frequency (MHz)</b>        | 300.13                                                                                                                        | <b>Nucleus</b>        | 1H                   | <b>Number of Transients</b> | 1            | <b>Original Points Count</b> | 8124    |
| <b>Points Count</b>           | 8192                                                                                                                          | <b>Pulse Sequence</b> | zg                   | <b>Solvent</b>              | CHLOROFORM-D | <b>Sweep Width (Hz)</b>      | 6009.62 |
| <b>Temperature (degree C)</b> | 35.200                                                                                                                        |                       |                      |                             |              |                              |         |

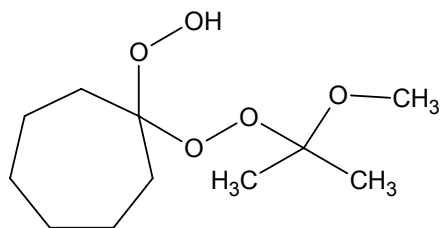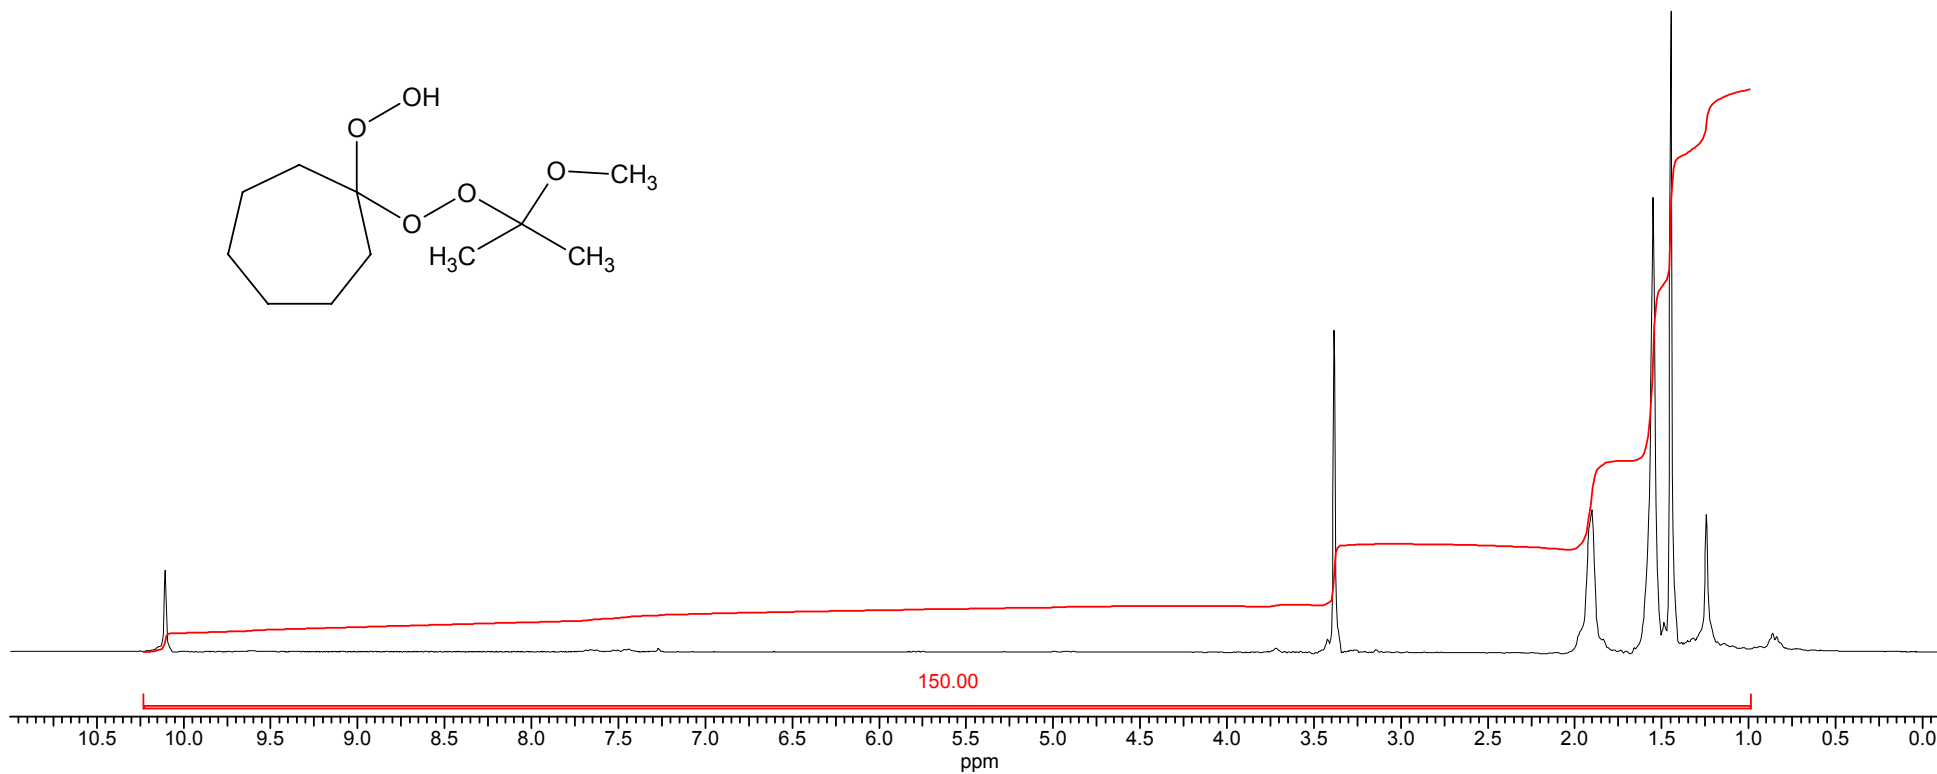

| No. | (ppm)      | Value   |
|-----|------------|---------|
| 1   | 99 .. 10.2 | 150.000 |



1-[(1-methoxy-1-methylethyl)peroxy]cycloheptyl hydroperoxide (**5a**)

|                               |                                                                                                       |                               |                                                     |                        |                     |
|-------------------------------|-------------------------------------------------------------------------------------------------------|-------------------------------|-----------------------------------------------------|------------------------|---------------------|
| <b>Acquisition Time (sec)</b> | 0.3359                                                                                                | <b>Comment</b>                | /PLAM GEMP178.C13 Opr:Struchkova M.I.;Solv:DMSO-d6; | <b>Date</b>            | 22/02/2008 16:07:23 |
| <b>File Name</b>              | C:\Documents and Settings\Пользователь\Мои документы\Документы\Платонов\Спектры фиды\plam\gemp178.c13 |                               |                                                     | <b>Frequency (MHz)</b> | 50.32               |
| <b>Nucleus</b>                | 13C                                                                                                   | <b>Original Points Count</b>  | 8192                                                | <b>Points Count</b>    | 8192                |
| <b>Sweep Width (Hz)</b>       | 12195.12                                                                                              | <b>Temperature (degree C)</b> | 24.000                                              | <b>Solvent</b>         | DMSO-D6             |

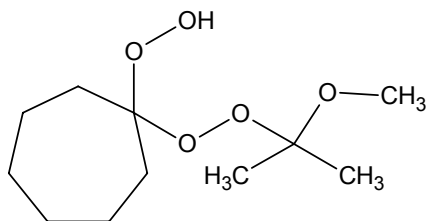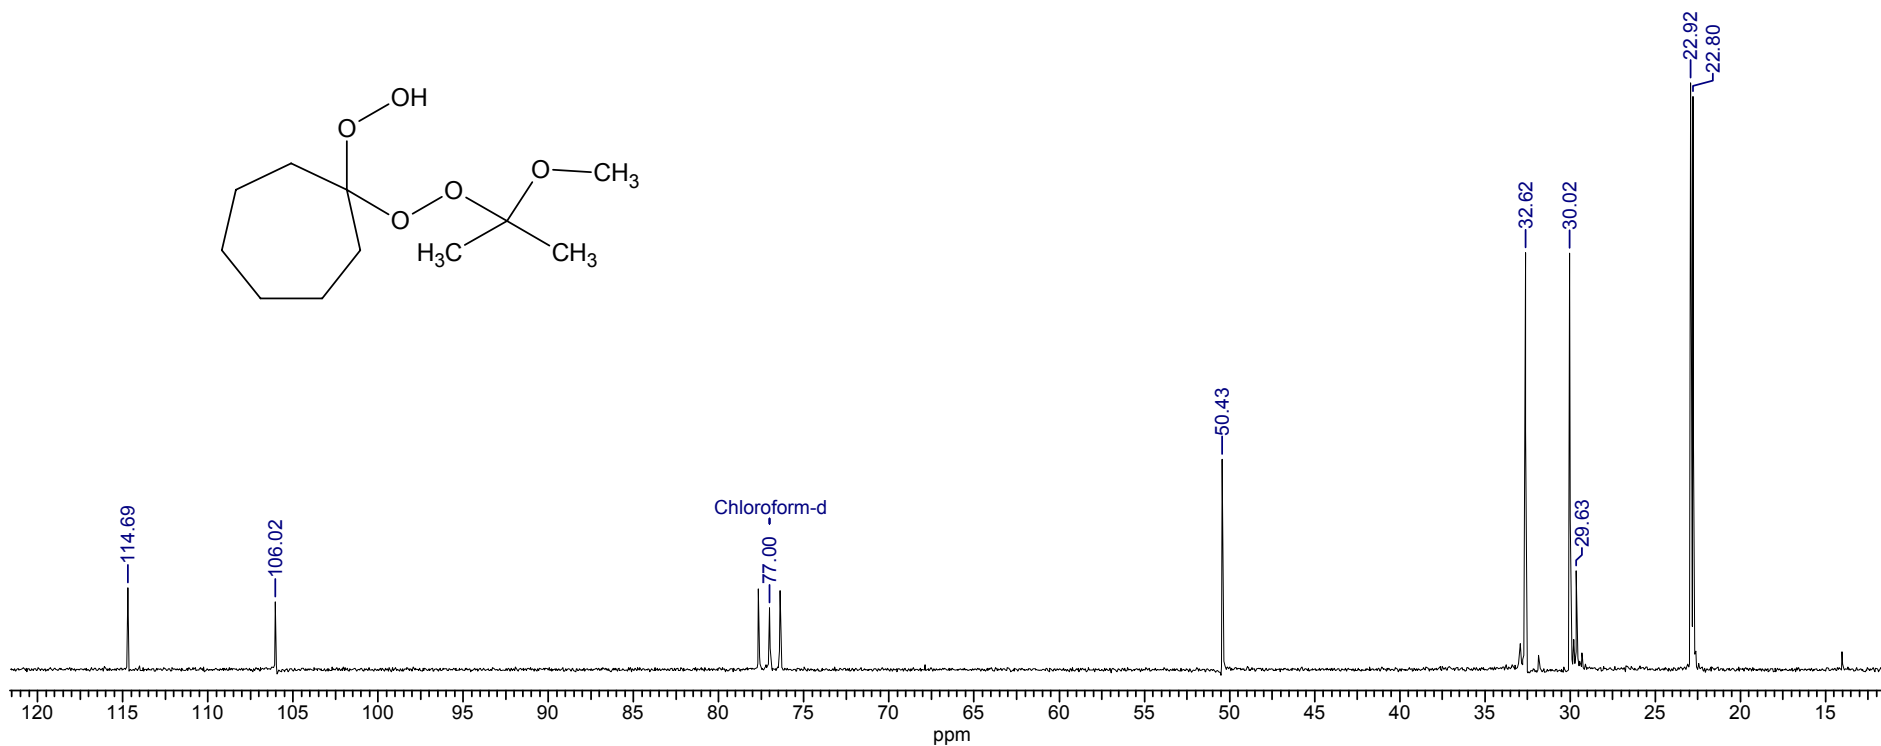

| No. | (ppm)  | (Hz)   | Height |
|-----|--------|--------|--------|
| 1   | 22.80  | 1147.3 | 0.9770 |
| 2   | 22.92  | 1153.3 | 1.0000 |
| 3   | 29.63  | 1491.3 | 0.1687 |
| 4   | 30.02  | 1510.6 | 0.7097 |
| 5   | 32.62  | 1641.6 | 0.7108 |
| 6   | 50.43  | 2537.9 | 0.3590 |
| 7   | 77.00  | 3874.9 | 0.1065 |
| 8   | 106.02 | 5335.5 | 0.1157 |
| 9   | 114.69 | 5771.7 | 0.1399 |

| No. | Annotation   | (ppm) |
|-----|--------------|-------|
| 1   | Chloroform-d | 77.00 |

1-[(1-methoxy-1-methyloctyl)peroxy]cycloheptyl hydroperoxide (**5b**)

|                               |                                                                                                    |                             |                                                   |                               |                     |
|-------------------------------|----------------------------------------------------------------------------------------------------|-----------------------------|---------------------------------------------------|-------------------------------|---------------------|
| <b>Acquisition Time (sec)</b> | 1.0240                                                                                             | <b>Comment</b>              | /TERN IODID697 □ Opr:Struchkova M.I.; Solv:CDCl3; | <b>Date</b>                   | 29/01/2008 17:54:26 |
| <b>File Name</b>              | C:\Documents and Settings\Пользователь\Мои документы\Документы\Платонов\Спектры фиды\tern\iodid697 |                             |                                                   | <b>Frequency (MHz)</b>        | 200.13              |
| <b>Nucleus</b>                | 1H                                                                                                 | <b>Number of Transients</b> | 12                                                | <b>Original Points Count</b>  | 8192                |
| <b>Solvent</b>                | DMSO-D6                                                                                            | <b>Sweep Width (Hz)</b>     | 4000.00                                           | <b>Temperature (degree C)</b> | 24.000              |

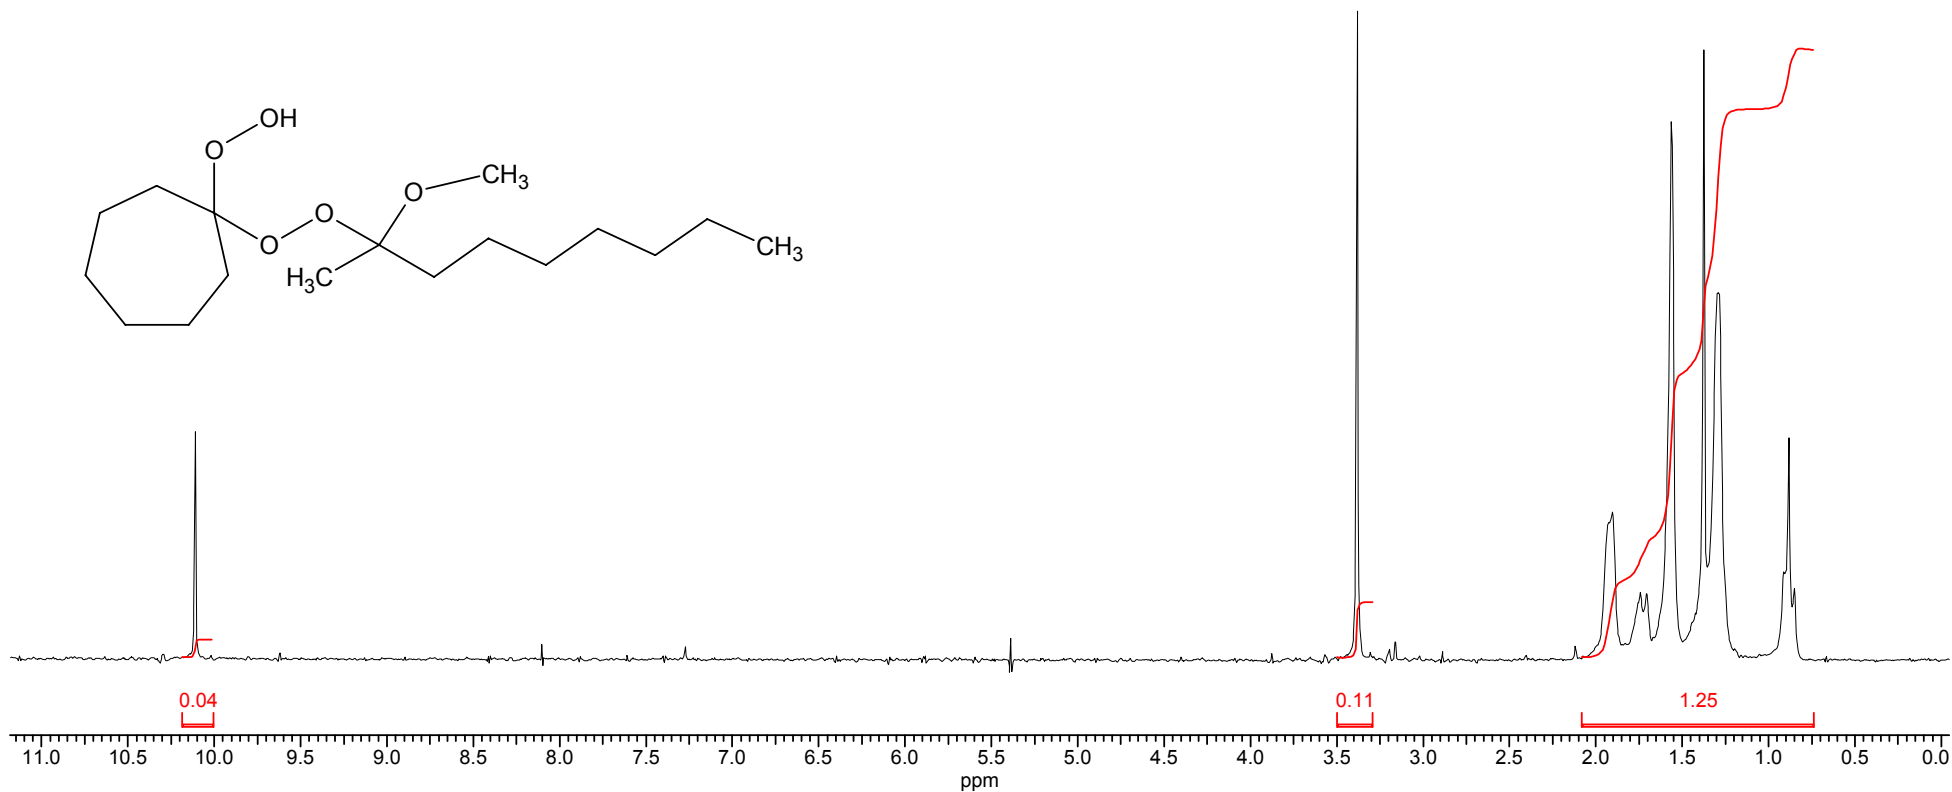

| No. | (ppm)       | Value |
|-----|-------------|-------|
| 1   | 1.74 .. 2.0 | 1.252 |
| 2   | 2.29 .. 3.5 | 0.114 |
| 3   | 3.01 .. 10. | 0.036 |

1-[(1-methoxy-1-methyloctyl)peroxy]cycloheptyl hydroperoxide (**5b**)

|                               |                                                                                                        |                               |                                                    |                        |                     |
|-------------------------------|--------------------------------------------------------------------------------------------------------|-------------------------------|----------------------------------------------------|------------------------|---------------------|
| <b>Acquisition Time (sec)</b> | 0.3359                                                                                                 | <b>Comment</b>                | /TERN IODID697.C13 Opr:Struchkova M.I.;Solv:CDCl3; | <b>Date</b>            | 29/01/2008 19:26:33 |
| <b>File Name</b>              | C:\Documents and Settings\Пользователь\Мои документы\Документы\Платонов\Спектры фиды\tern\iodid697.c13 |                               |                                                    | <b>Frequency (MHz)</b> | 50.32               |
| <b>Nucleus</b>                | 13C                                                                                                    | <b>Original Points Count</b>  | 8192                                               | <b>Points Count</b>    | 8192                |
| <b>Sweep Width (Hz)</b>       | 12195.12                                                                                               | <b>Temperature (degree C)</b> | 24.000                                             | <b>Solvent</b>         | DMSO-D6             |

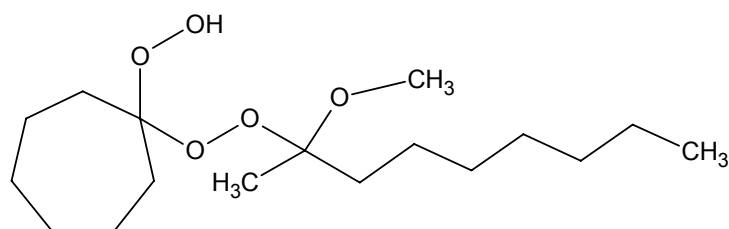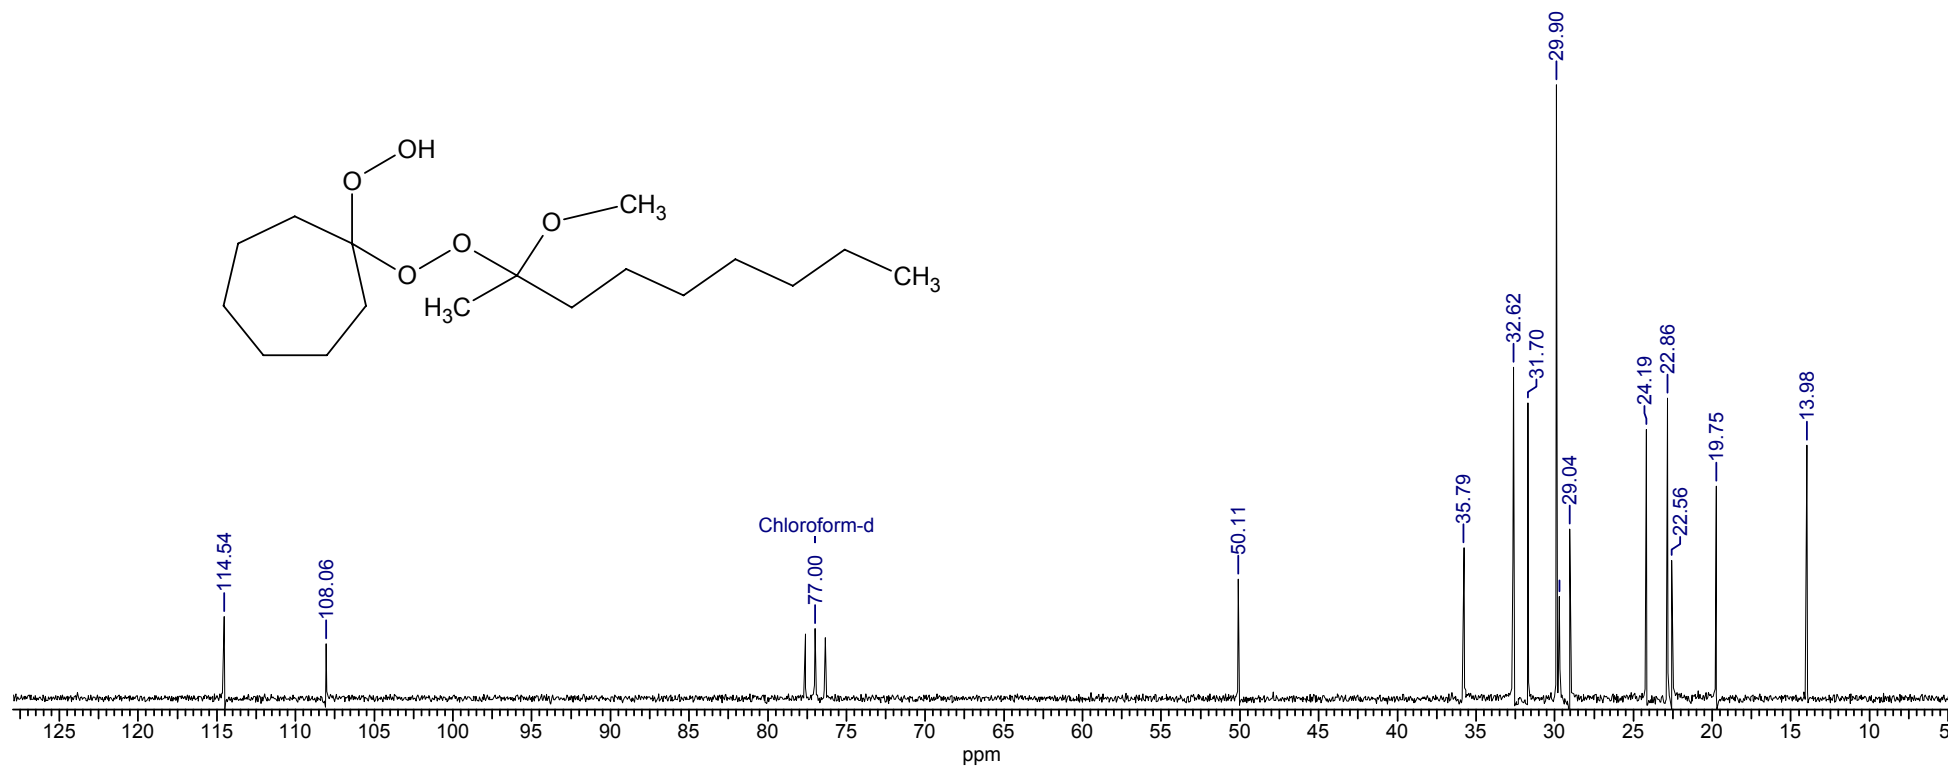

| No. | (ppm) | (Hz)   | Height | No. | (ppm)  | (Hz)   | Height |
|-----|-------|--------|--------|-----|--------|--------|--------|
| 1   | 13.98 | 703.7  | 0.4124 | 9   | 31.70  | 1595.5 | 0.4816 |
| 2   | 19.75 | 994.0  | 0.3457 | 10  | 32.62  | 1641.6 | 0.5397 |
| 3   | 22.56 | 1135.4 | 0.2239 | 11  | 35.79  | 1800.9 | 0.2445 |
| 4   | 22.86 | 1150.3 | 0.4893 | 12  | 50.11  | 2521.5 | 0.1934 |
| 5   | 24.19 | 1217.3 | 0.4378 | 13  | 77.00  | 3874.9 | 0.1126 |
| 6   | 29.04 | 1461.5 | 0.2753 | 14  | 108.06 | 5438.2 | 0.0881 |
| 7   | 29.69 | 1494.2 | 0.1651 | 15  | 114.54 | 5764.2 | 0.1331 |
| 8   | 29.90 | 1504.7 | 1.0000 |     |        |        |        |

| No. | Annotation   | (ppm) |
|-----|--------------|-------|
| 1   | Chloroform-d | 77.00 |

1-[(1-ethoxycyclopentyl)peroxy]cycloheptyl hydroperoxide (**5c**)

|                               |                                                                                                                                         |                       |                   |                             |                      |
|-------------------------------|-----------------------------------------------------------------------------------------------------------------------------------------|-----------------------|-------------------|-----------------------------|----------------------|
| <b>Acquisition Time (sec)</b> | 0.6759                                                                                                                                  | <b>Comment</b>        | Avance-300, CDCl3 | <b>Date</b>                 | 28 Jan 2008 14:49:36 |
| <b>File Name</b>              | C:\Documents and Settings\Пользователь\Мои документы\Документы\Платонов\Спектры фиды\tern\iodid707.001.{1H}\iodid707.001.{1H}_001000fid |                       |                   |                             |                      |
| <b>Frequency (MHz)</b>        | 300.13                                                                                                                                  | <b>Nucleus</b>        | 1H                | <b>Number of Transients</b> | 1                    |
| <b>Points Count</b>           | 8192                                                                                                                                    | <b>Pulse Sequence</b> | zg                | <b>Solvent</b>              | CHLOROFORM-D         |
| <b>Temperature (degree C)</b> | 30.000                                                                                                                                  |                       |                   | <b>Sweep Width (Hz)</b>     | 6009.62              |

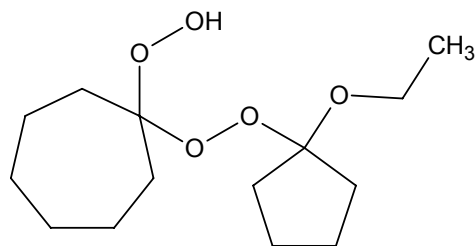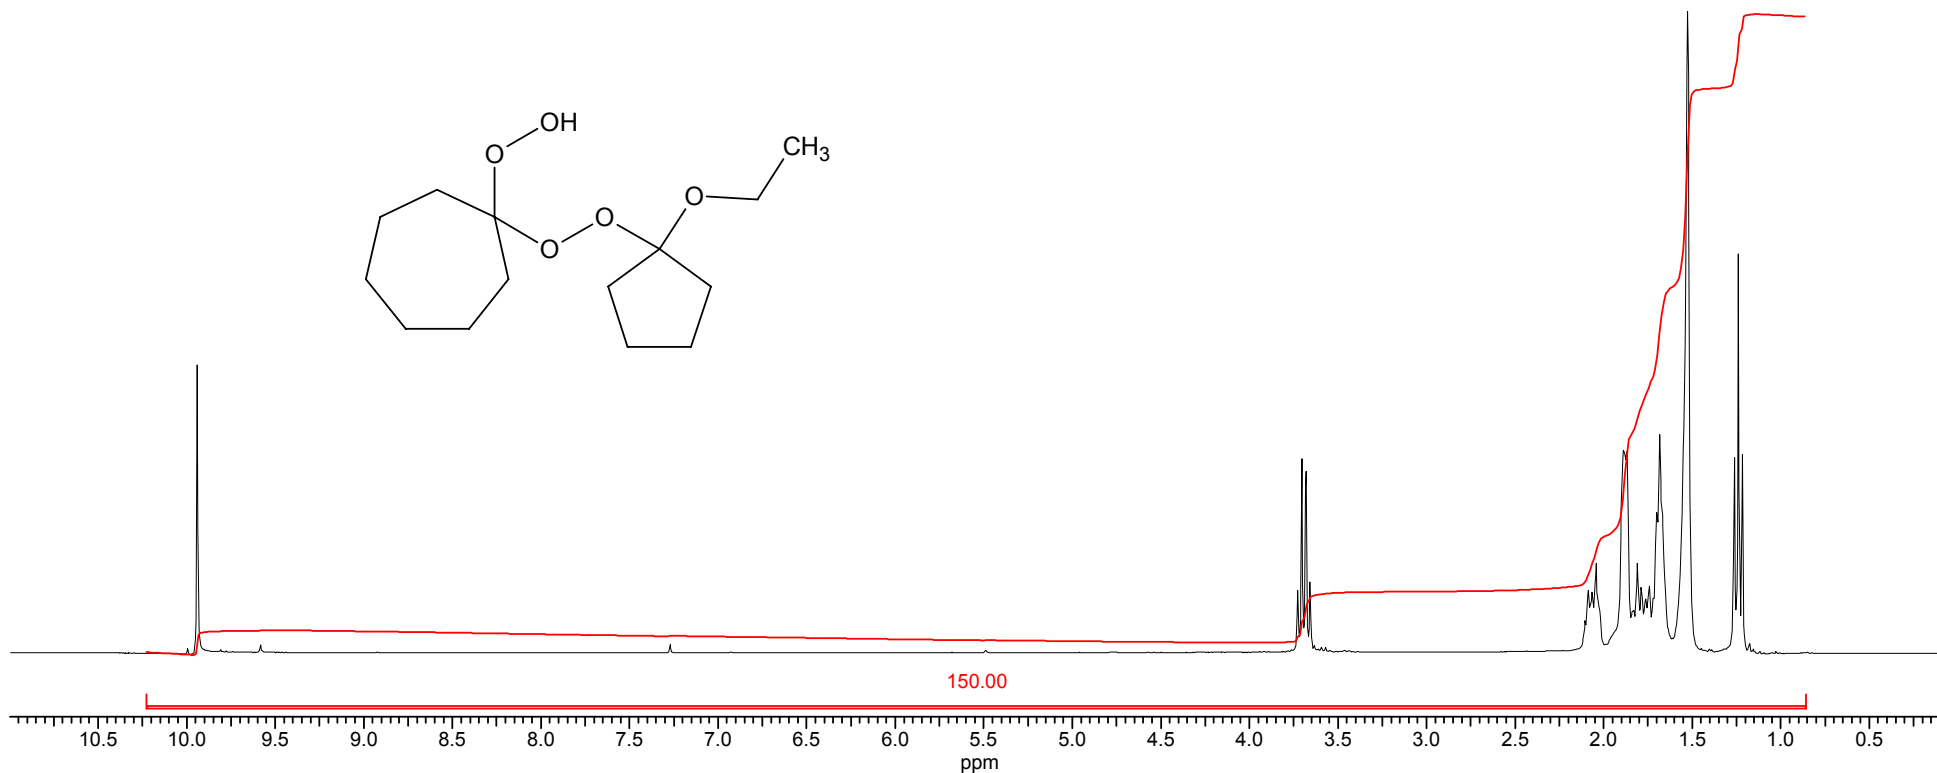

| No. | (ppm)      | Value   |
|-----|------------|---------|
| 1   | 86 .. 10.2 | 150.000 |

1-[(1-ethoxycyclopentyl)peroxy]cycloheptyl hydroperoxide (**5c**)

|                        |                                                                                                       |                        |                                                    |                 |                     |
|------------------------|-------------------------------------------------------------------------------------------------------|------------------------|----------------------------------------------------|-----------------|---------------------|
| Acquisition Time (sec) | 0.3359                                                                                                | Comment                | /TERN IODID707.C13 Opr:Struchkova M.I.;Solv:CDCl3; | Date            | 29/01/2008 19:04:31 |
| File Name              | C:\Documents and Settings\Пользователь\Мои документы\Документы\Платонов\Спектры фиды\terniodid707.c13 |                        |                                                    | Frequency (MHz) | 50.32               |
| Nucleus                | 13C                                                                                                   | Original Points Count  | 8192                                               | Points Count    | 8192                |
| Sweep Width (Hz)       | 12195.12                                                                                              | Temperature (degree C) | 24.000                                             | Solvent         | DMSO-D6             |

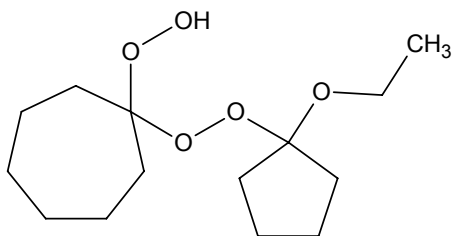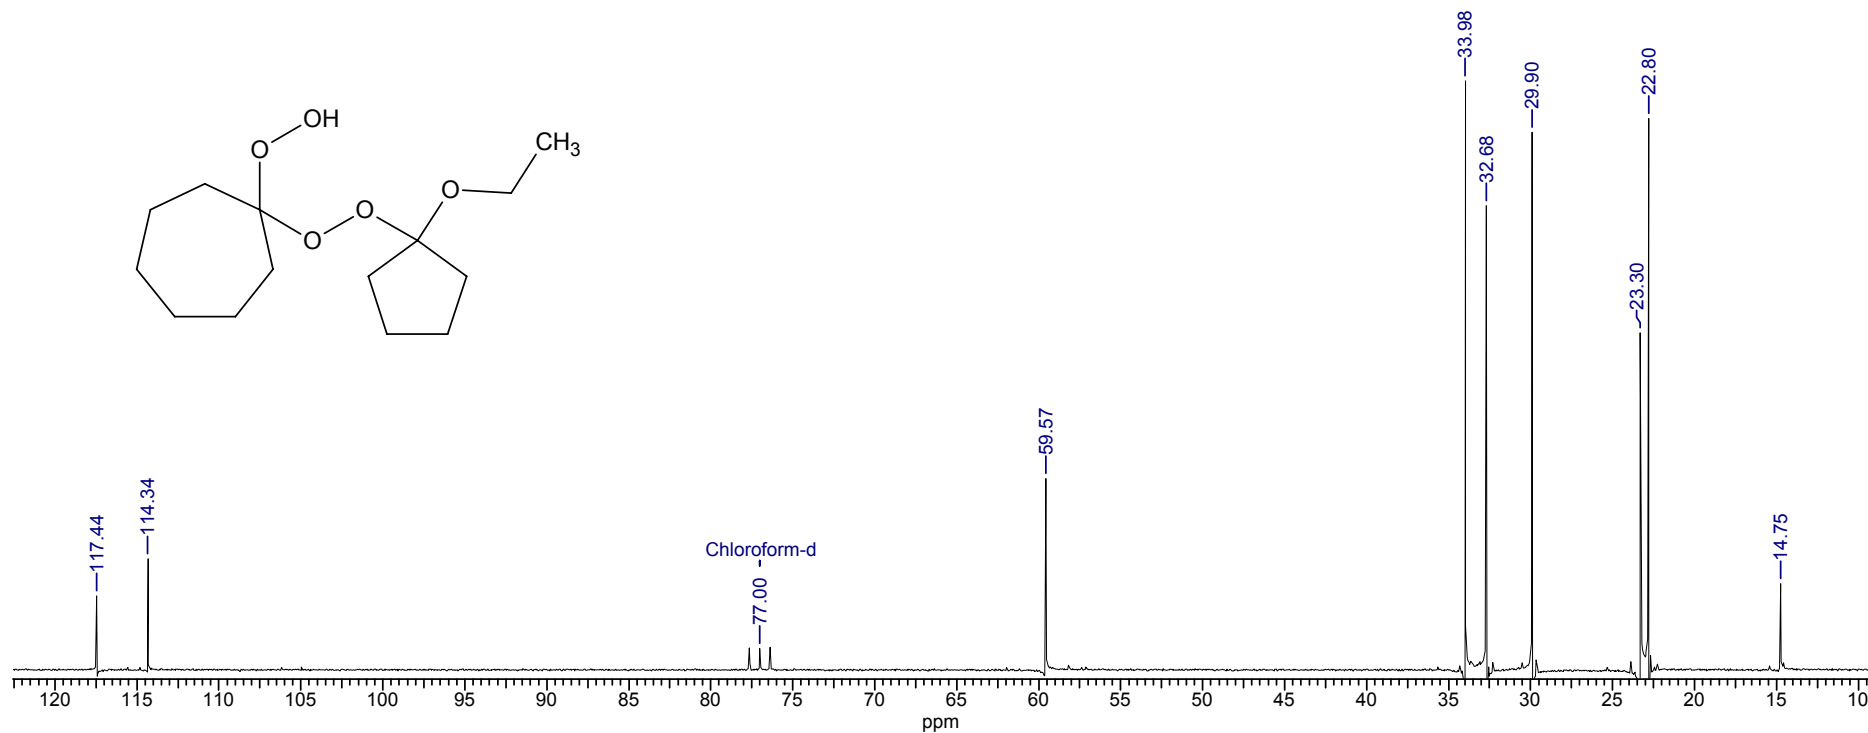

| No. | (ppm)  | (Hz)   | Height |
|-----|--------|--------|--------|
| 1   | 14.75  | 742.4  | 0.1458 |
| 2   | 22.80  | 1147.4 | 0.9364 |
| 3   | 23.30  | 1172.7 | 0.5719 |
| 4   | 29.90  | 1504.7 | 0.9123 |
| 5   | 32.68  | 1644.6 | 0.7876 |
| 6   | 33.98  | 1710.2 | 1.0000 |
| 7   | 59.57  | 2998.0 | 0.3241 |
| 8   | 77.00  | 3874.9 | 0.0356 |
| 9   | 114.34 | 5753.9 | 0.1876 |
| 10  | 117.44 | 5910.2 | 0.1246 |

| No. | Annotation   | (ppm) |
|-----|--------------|-------|
| 1   | Chloroform-d | 77.00 |

1-[(1-methoxy-1-methylethyl)peroxy]cyclododecyl hydroperoxide (**6a**)

|                               |                                                                                                                                       |                       |                   |                             |                      |
|-------------------------------|---------------------------------------------------------------------------------------------------------------------------------------|-----------------------|-------------------|-----------------------------|----------------------|
| <b>Acquisition Time (sec)</b> | 0.6759                                                                                                                                | <b>Comment</b>        | Avance-300, CDCl3 | <b>Date</b>                 | 23 Jan 2008 10:44:16 |
| <b>File Name</b>              | C:\Documents and Settings\Пользователь\Мои документы\Документы\Платонов\Спектры фиды\plam\gemp166.001.{1H}\gemp166.001.{1H}_001000fid |                       |                   |                             |                      |
| <b>Frequency (MHz)</b>        | 300.13                                                                                                                                | <b>Nucleus</b>        | 1H                | <b>Number of Transients</b> | 1                    |
| <b>Points Count</b>           | 8192                                                                                                                                  | <b>Pulse Sequence</b> | zg                | <b>Solvent</b>              | CHLOROFORM-D         |
| <b>Temperature (degree C)</b> | 21.700                                                                                                                                |                       |                   | <b>Sweep Width (Hz)</b>     | 6009.62              |

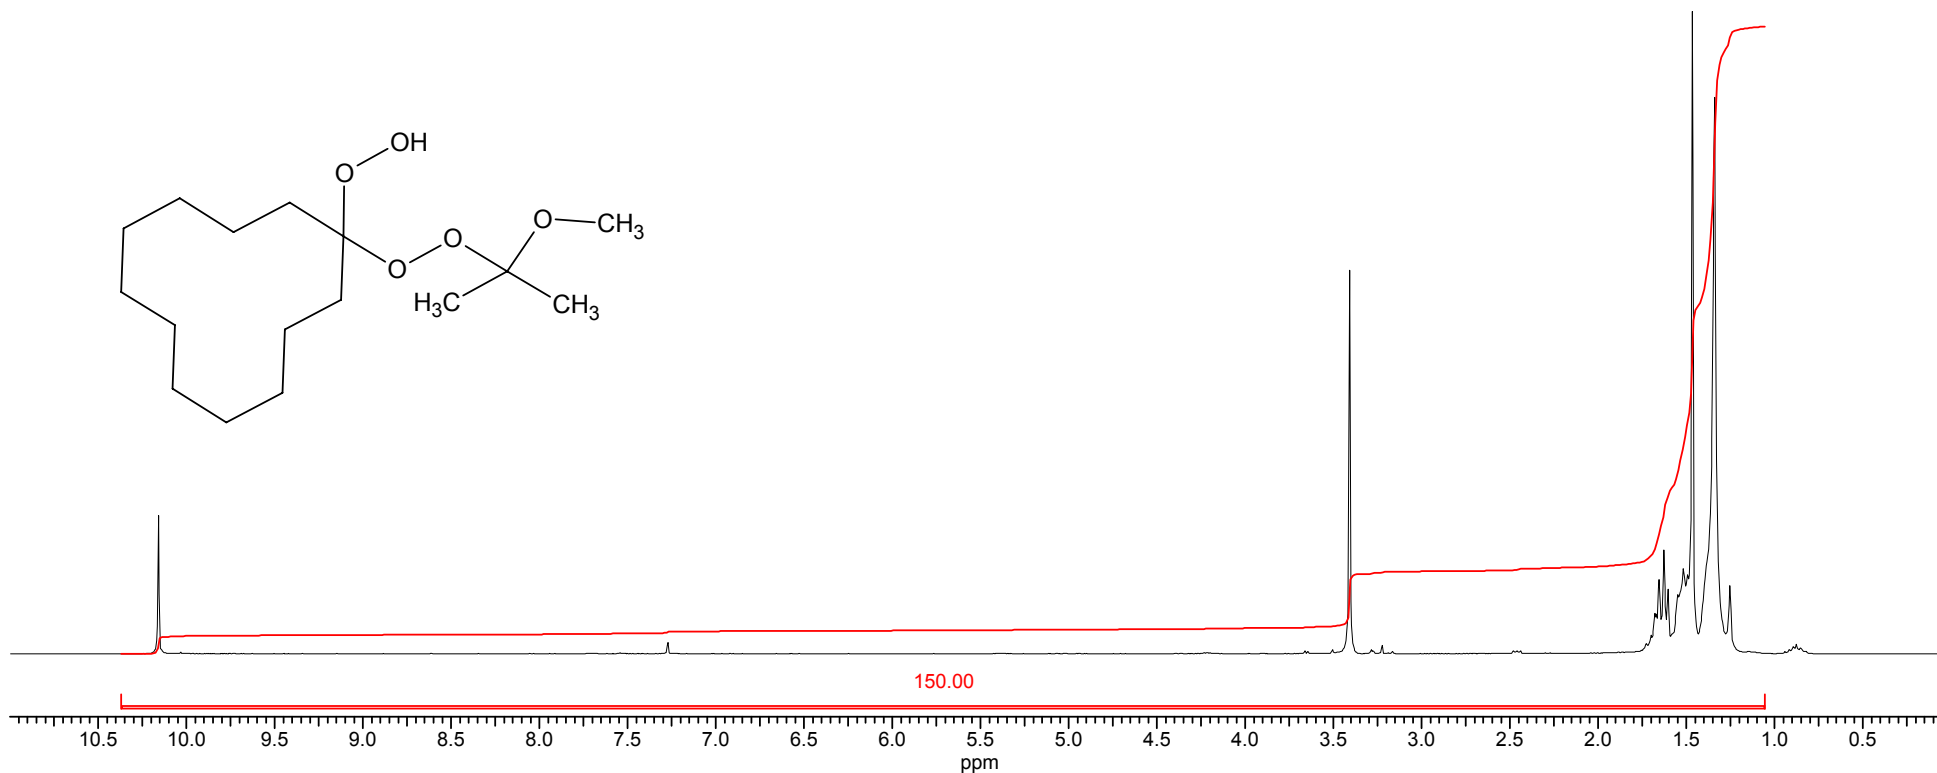

| No. | (ppm) | Value   |
|-----|-------|---------|
| 1   | 10.3  | 150.000 |

1-[(1-methoxy-1-methylethyl)peroxy]cyclododecyl hydroperoxide (**6a**)

|                               |                                                                                                                                         |                       |                         |                             |                      |
|-------------------------------|-----------------------------------------------------------------------------------------------------------------------------------------|-----------------------|-------------------------|-----------------------------|----------------------|
| <b>Acquisition Time (sec)</b> | 0.4501                                                                                                                                  | <b>Comment</b>        | Avance-300, C-13, CDCl3 | <b>Date</b>                 | 23 Jan 2008 10:46:24 |
| <b>File Name</b>              | C:\Documents and Settings\Пользователь\Мои документы\Документы\Платонов\Спектры фиды\plam\gemp166.013.{13C}\gemp166.013.{13C}_013000fid |                       |                         |                             |                      |
| <b>Frequency (MHz)</b>        | 75.48                                                                                                                                   | <b>Nucleus</b>        | 13C                     | <b>Number of Transients</b> | 623                  |
| <b>Points Count</b>           | 16384                                                                                                                                   | <b>Pulse Sequence</b> | zgpg30base              | <b>Solvent</b>              | CHLOROFORM-D         |
| <b>Temperature (degree C)</b> | 21.800                                                                                                                                  |                       |                         | <b>Sweep Width (Hz)</b>     | 18115.94             |

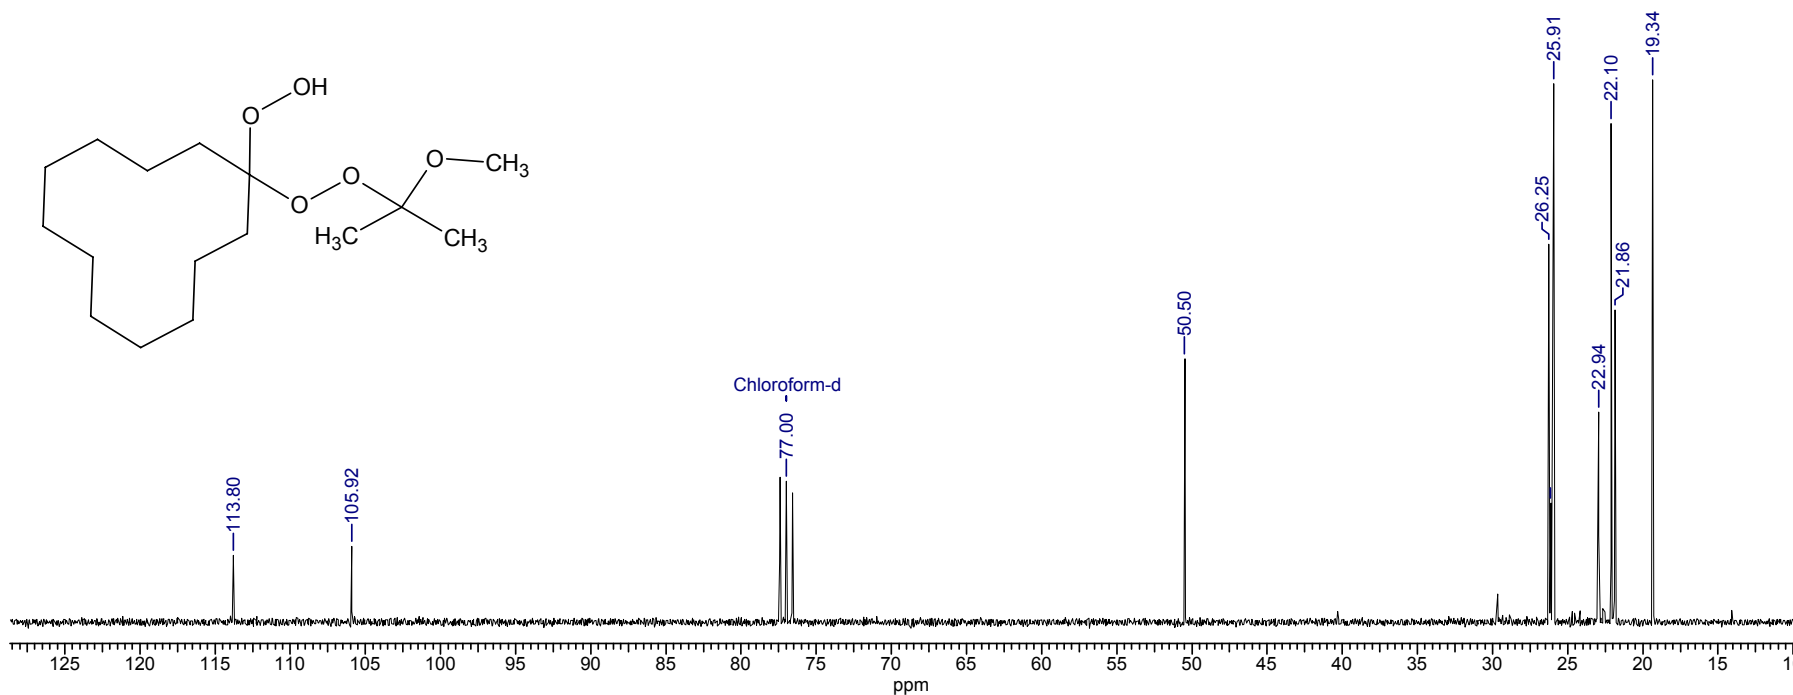

| No. | (ppm)  | (Hz)   | Height |
|-----|--------|--------|--------|
| 1   | 19.34  | 1459.3 | 1.0000 |
| 2   | 21.86  | 1649.5 | 0.5766 |
| 3   | 22.10  | 1668.3 | 0.9195 |
| 4   | 22.94  | 1731.4 | 0.3873 |
| 5   | 25.91  | 1955.8 | 0.9933 |
| 6   | 26.13  | 1972.4 | 0.2205 |
| 7   | 26.25  | 1981.3 | 0.6974 |
| 8   | 50.50  | 3811.3 | 0.4864 |
| 9   | 77.00  | 5811.7 | 0.2602 |
| 10  | 105.92 | 7994.5 | 0.1400 |
| 11  | 113.80 | 8589.4 | 0.1234 |

| No. | Annotation   | (ppm) |
|-----|--------------|-------|
| 1   | Chloroform-d | 77.00 |

1-[(1-methoxycyclohexyl)peroxy]cyclododecyl hydroperoxide (**6d**)

|                               |                                                                                                                                       |                       |                   |                             |                      |
|-------------------------------|---------------------------------------------------------------------------------------------------------------------------------------|-----------------------|-------------------|-----------------------------|----------------------|
| <b>Acquisition Time (sec)</b> | 0.6759                                                                                                                                | <b>Comment</b>        | Avance-300, CDCl3 | <b>Date</b>                 | 29 Jan 2008 14:26:08 |
| <b>File Name</b>              | C:\Documents and Settings\Пользователь\Мои документы\Документы\Платонов\Спектры фиды\plam\gemp171.001.{1H}\gemp171.001.{1H}_001000fid |                       |                   |                             |                      |
| <b>Frequency (MHz)</b>        | 300.13                                                                                                                                | <b>Nucleus</b>        | <sup>1</sup> H    | <b>Number of Transients</b> | 1                    |
| <b>Points Count</b>           | 8192                                                                                                                                  | <b>Pulse Sequence</b> | zg                | <b>Solvent</b>              | CHLOROFORM-D         |
| <b>Temperature (degree C)</b> | 22.500                                                                                                                                |                       |                   | <b>Sweep Width (Hz)</b>     | 6009.62              |

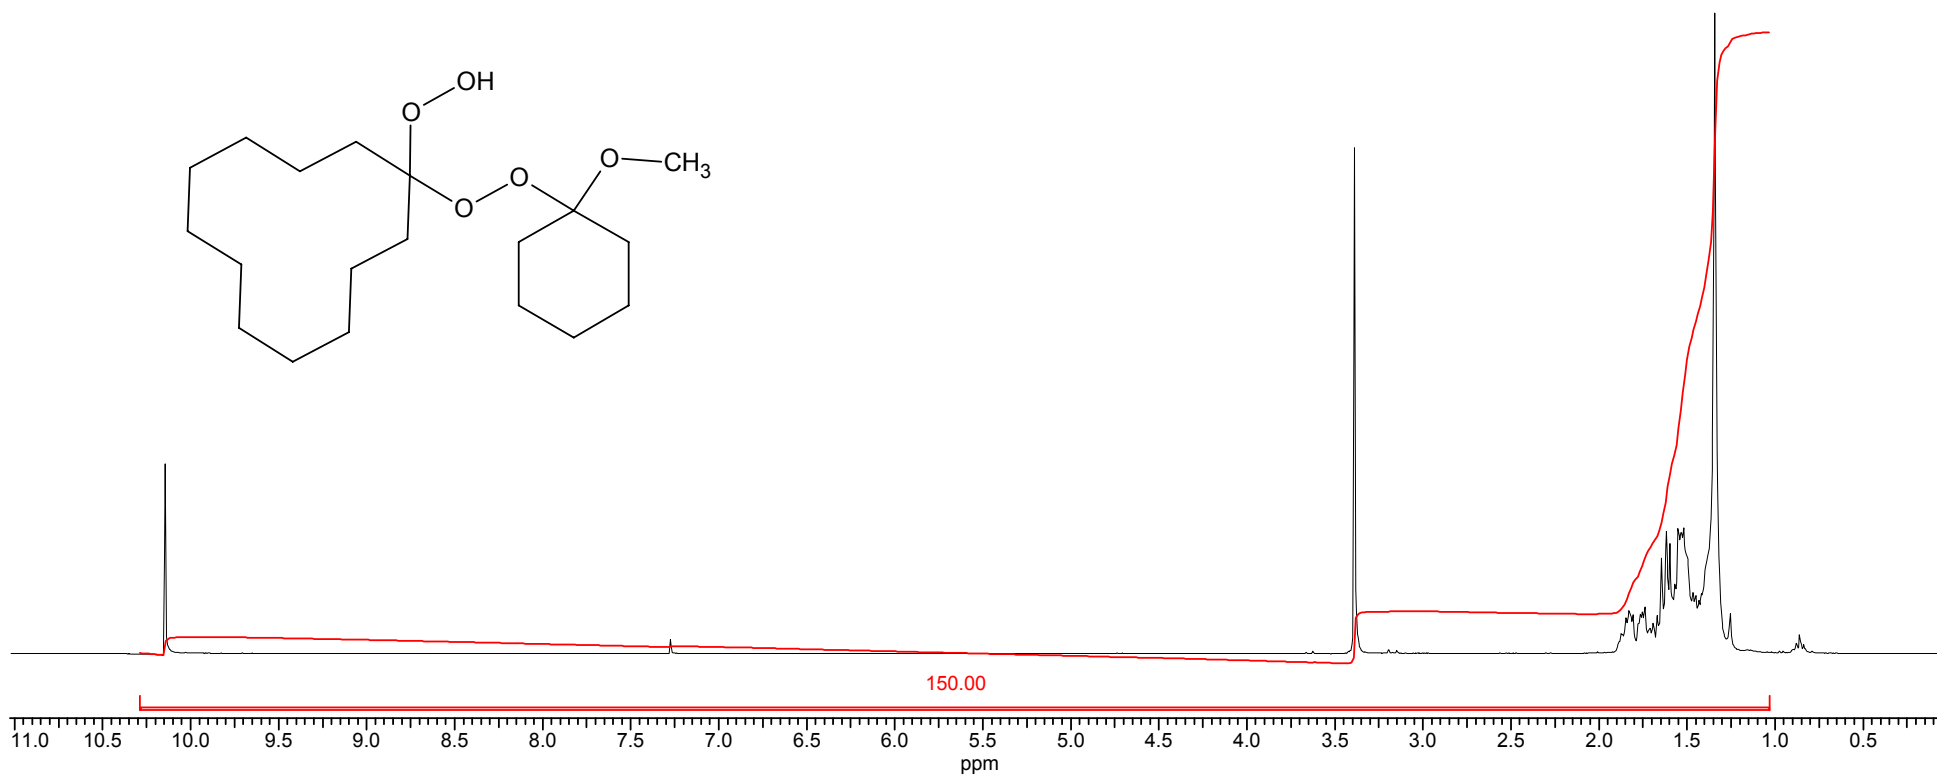

| No. | (ppm)      | Value   |
|-----|------------|---------|
| 1   | 03 .. 10.2 | 150.000 |



1-[(1-methoxycyclohexyl)peroxy]cyclododecyl hydroperoxide (**6d**)

|                               |                                                                                                                                         |                       |                         |                             |              |                              |          |
|-------------------------------|-----------------------------------------------------------------------------------------------------------------------------------------|-----------------------|-------------------------|-----------------------------|--------------|------------------------------|----------|
| <b>Acquisition Time (sec)</b> | 0.4501                                                                                                                                  | <b>Comment</b>        | Avance-300, C-13, CDCl3 |                             | <b>Date</b>  | 29 Jan 2008 14:26:08         |          |
| <b>File Name</b>              | C:\Documents and Settings\Пользователь\Мои документы\Документы\Платонов\Спектры фиды\plam\gemp171.013.{13C}\gemp171.013.{13C}_013000fid |                       |                         |                             |              |                              |          |
| <b>Frequency (MHz)</b>        | 75.48                                                                                                                                   | <b>Nucleus</b>        | 13C                     | <b>Number of Transients</b> | 528          | <b>Original Points Count</b> | 16308    |
| <b>Points Count</b>           | 16384                                                                                                                                   | <b>Pulse Sequence</b> | zgpg30base              | <b>Solvent</b>              | CHLOROFORM-D | <b>Sweep Width (Hz)</b>      | 18115.94 |
| <b>Temperature (degree C)</b> | 22.500                                                                                                                                  |                       |                         |                             |              |                              |          |

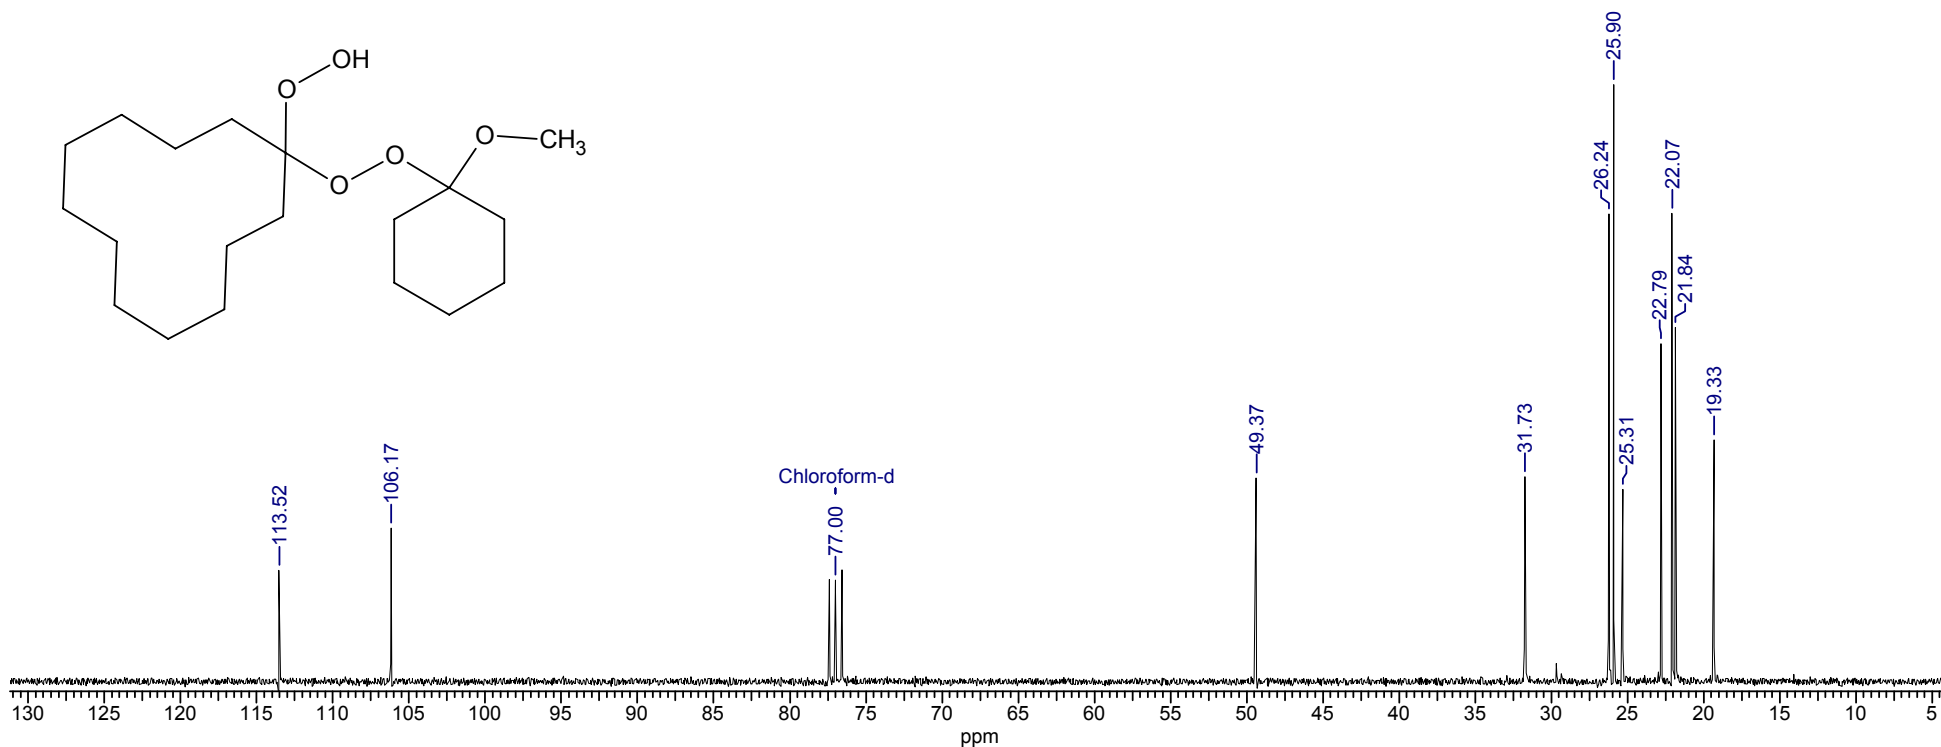

| No. | (ppm) | (Hz)   | Height | No. | (ppm)  | (Hz)   | Height |
|-----|-------|--------|--------|-----|--------|--------|--------|
| 1   | 19.33 | 1459.3 | 0.4048 | 8   | 26.24  | 1980.1 | 0.7832 |
| 2   | 21.84 | 1648.4 | 0.5933 | 9   | 31.73  | 2394.8 | 0.3427 |
| 3   | 22.07 | 1666.1 | 0.7844 | 10  | 49.37  | 3726.1 | 0.3409 |
| 4   | 22.79 | 1720.3 | 0.5657 | 11  | 77.00  | 5811.6 | 0.1700 |
| 5   | 25.31 | 1910.5 | 0.3220 | 12  | 106.17 | 8013.2 | 0.2573 |
| 6   | 25.90 | 1954.7 | 1.0000 | 13  | 113.52 | 8568.3 | 0.1859 |
| 7   | 26.15 | 1973.5 | 0.3431 |     |        |        |        |

| No. | Annotation   | (ppm) |
|-----|--------------|-------|
| 1   | Chloroform-d | 77.00 |
